# Supplementary material for: Synaptic imbalance and increased inhibition impair motor function in SMA
Source: PubMed Central journal article supplement — bioRxiv. 2024 Sep 1:2024.08.30.610545. Preprint. [Version 1] doi: 10.1101/2024.08.30.610545 (PMC11383993; doi:10.1101/2024.08.30.610545), 2024-09-01

1012 **SUPPLEMENTAL FIGURES**

1013 **Suppl. Fig. 1. (Associated with Fig.3). Renshaw cells receive VGluT1+ synapses originating**  
1014 **in corticospinal neurons. (A<sub>1-2</sub>)** Experimental protocol for labelling corticospinal synapses (A<sub>1</sub>).  
1015 Mice injected at birth (P0) with AAV9-GFP bilaterally in the cortex (A<sub>2</sub>). At P10, the L1 and L2  
1016 spinal segments were examined with immunohistochemistry. **(B<sub>1-4</sub>, C<sub>1-4</sub>)** Single plane confocal  
1017 images of a wild type (B<sub>1-4</sub>) and a SMA (C<sub>1-4</sub>) Renshaw cell labelled with calbindin (blue, B<sub>1</sub> and  
1018 C<sub>1</sub>), AAV9-GFP (green, B<sub>2</sub> and C<sub>2</sub>), VGluT1 (red, B<sub>3</sub> and C<sub>3</sub>) antibodies. Merged images are  
1019 shown in B<sub>4</sub> and C<sub>4</sub>. Insets are areas indicated by the dotted boxes, showing GFP+ and VGluT1+  
1020 synapses on the soma (yellow arrows) of Renshaw cells. **(D<sub>1,2</sub>)** Neurolucida reconstruction of a  
1021 wild type (D<sub>1</sub>) and a SMA (D<sub>2</sub>) Renshaw cell with cholinergic (VACht+) synapses marked by red  
1022 dots. **(E)** Number of cholinergic (VACht+) synapses on the soma (left graph) and dendrites (right  
1023 graph) of Renshaw cells in wild type (blue) and SMA (red) without spinal cord transection at P10.  
1024 Differences were significant on cell bodies (\*\* p=0.0018 unpaired two-tailed t-test) but not on  
1025 dendrites. (n=20 or 10 Renshaw cells per animal; N=2 WT and 2 SMA mice) **(F)** Number of  
1026 cholinergic (VACht+) synapses on the soma (left graph) and dendrites (right graph) of Renshaw  
1027 cells in wild type (blue) (n=14, N=3) and SMA (red) two days after T4 spinal cord transection at  
1028 P10 (n=17, N=3). Differences are non-significant (unpaired two-tailed t-test).

1029

1030 **Suppl. Fig. 2. (Associated with Fig.4). No electrophysiological differences in SMA spinal**  
1031 **interneurons that do not receive proprioceptive synapses. (A)** Superimposed voltage  
1032 responses (top traces) following current injection (bottom traces) in spinal interneurons that do  
1033 not receive direct proprioceptive synapses in wild type and SMA mice at P4. **(B)** Resting  
1034 membrane potential (RMP), input resistance ( $R_{IN}$ ), voltage threshold ( $V_{Th}$ ), time constant ( $\tau$ ) and  
1035 capacitance of spinal interneurons without direct proprioceptive activation in wild type (blue, n=15  
1036 neurons, N=15 mice) and SMA (red, n=14 neurons, N=14 mice) mice at P4.

1037

1038 **Suppl. Fig. 3. (Associated with Fig.5). Validation of mIPSCs in wild type and SMA motor**  
1039 **neurons.** Current recordings from voltage clamp experiment in wild type **(A)** and SMA **(B)** motor  
1040 neurons in which mIPSCs (top traces) were abolished by application of bicuculine and strychnine  
1041 (bottom traces).

1042

1043 **Suppl. Fig. 4. (Associated with Fig.6). Validation of gephyrin knockdown; no difference in**  
1044 **NKCC1 or KCC2 between wild type and SMA mice; behavioral phenotype injected with**  
1045 **AAV9-Geph<sub>RNAi</sub> or treated *in vivo* with Org25543. (A)** Map of the plasmid for gephyrin  
1046 knockdown. **(B<sub>1-3</sub>)** Confocal images from the ventral spinal cord of a wild type mouse at P4  
1047 showing ChAT (red, B<sub>1</sub>), AAV9-Gephyrin<sub>RNAi</sub>-GFP (green, B<sub>2</sub>) immunoreactivity and their merged  
1048 image (B<sub>3</sub>). **(C)** Percentage of motor neurons (MNs) transduced by AAV9-Gephyrin<sub>RNAi</sub>-GFP in  
1049 wild type (n=295 MNs, N=6) and SMA (n=191 MNs, N=7) mice at P11. Each data point represents  
1050 one mouse. **(D)** GFP (green) and gephyrin (red) in a wild type (left) and a SMA (right) motor  
1051 neuron at P11. Images at the bottom are higher magnification areas from the dashed boxes,  
1052 respectively. **(E)** Number of gephyrin clusters per  $\mu\text{m}$  of motor neuron membrane in wild type mice  
1053 (blue; n=15 MNs, N=3 mice), wild type mice injected with AAV9-Geph<sub>RNAi</sub> (cyan; n=15 MNs, N=3  
1054 mice), SMA mice (red; n=17 MNs, N=3 mice) and SMA mice injected with AAV9-Geph<sub>RNAi</sub> (green,  
1055 n=18 MNs, N=3 mice). \*\*  $p=0.002$ , WT vs WT+Geph<sub>RNAi</sub>; \*\*  $p=0.0063$ , WT vs SMA; \*\*\*  $p<0.0001$ ,  
1056 SMA vs SMA+Geph<sub>RNAi</sub>; OneWay ANOVA, Tukey's *post hoc* test. "ns": not significant. Relative  
1057 expression of *nkcc1* and *kcc2* in medial L5 motor neurons **(F)** and lateral L5 motor neurons **(G)** in  
1058 wild type (N=3) and SMA (N=3) mice. **(H)** Average life span in SMA mice injected with AAV9-GFP  
1059 (as controls, N=9 mice) or with AAV9-Gephyrin<sub>RNAi</sub>-GFP (N=15 mice). **(I)** Body weight gain in wild  
1060 type (blue, N=17 mice), wild type mice treated with Org25543 (cyan, N=7 mice), SMA mice (red,  
1061 N=7 mice) and SMA mice treated with Org25543 (purple, N=9 mice).

1062

1063

1064

1065

1066

1067

1068

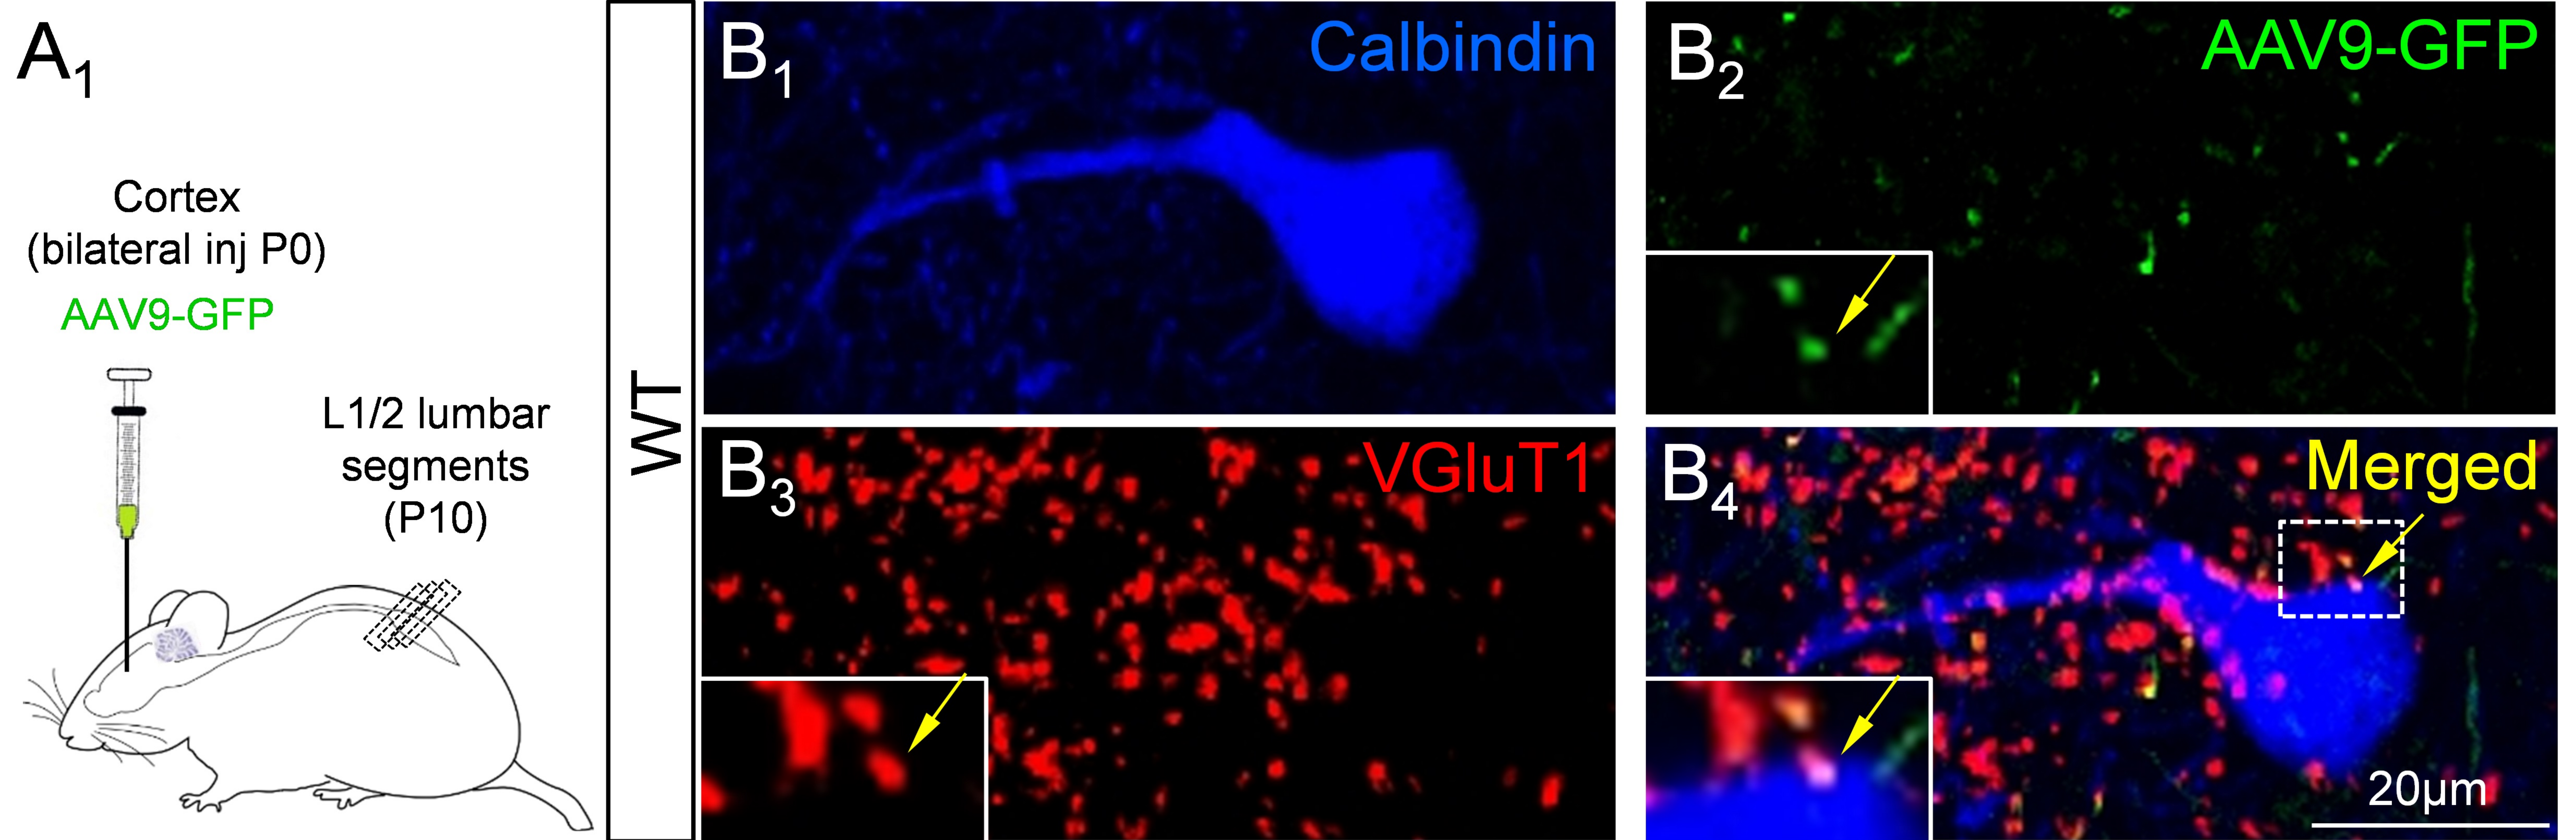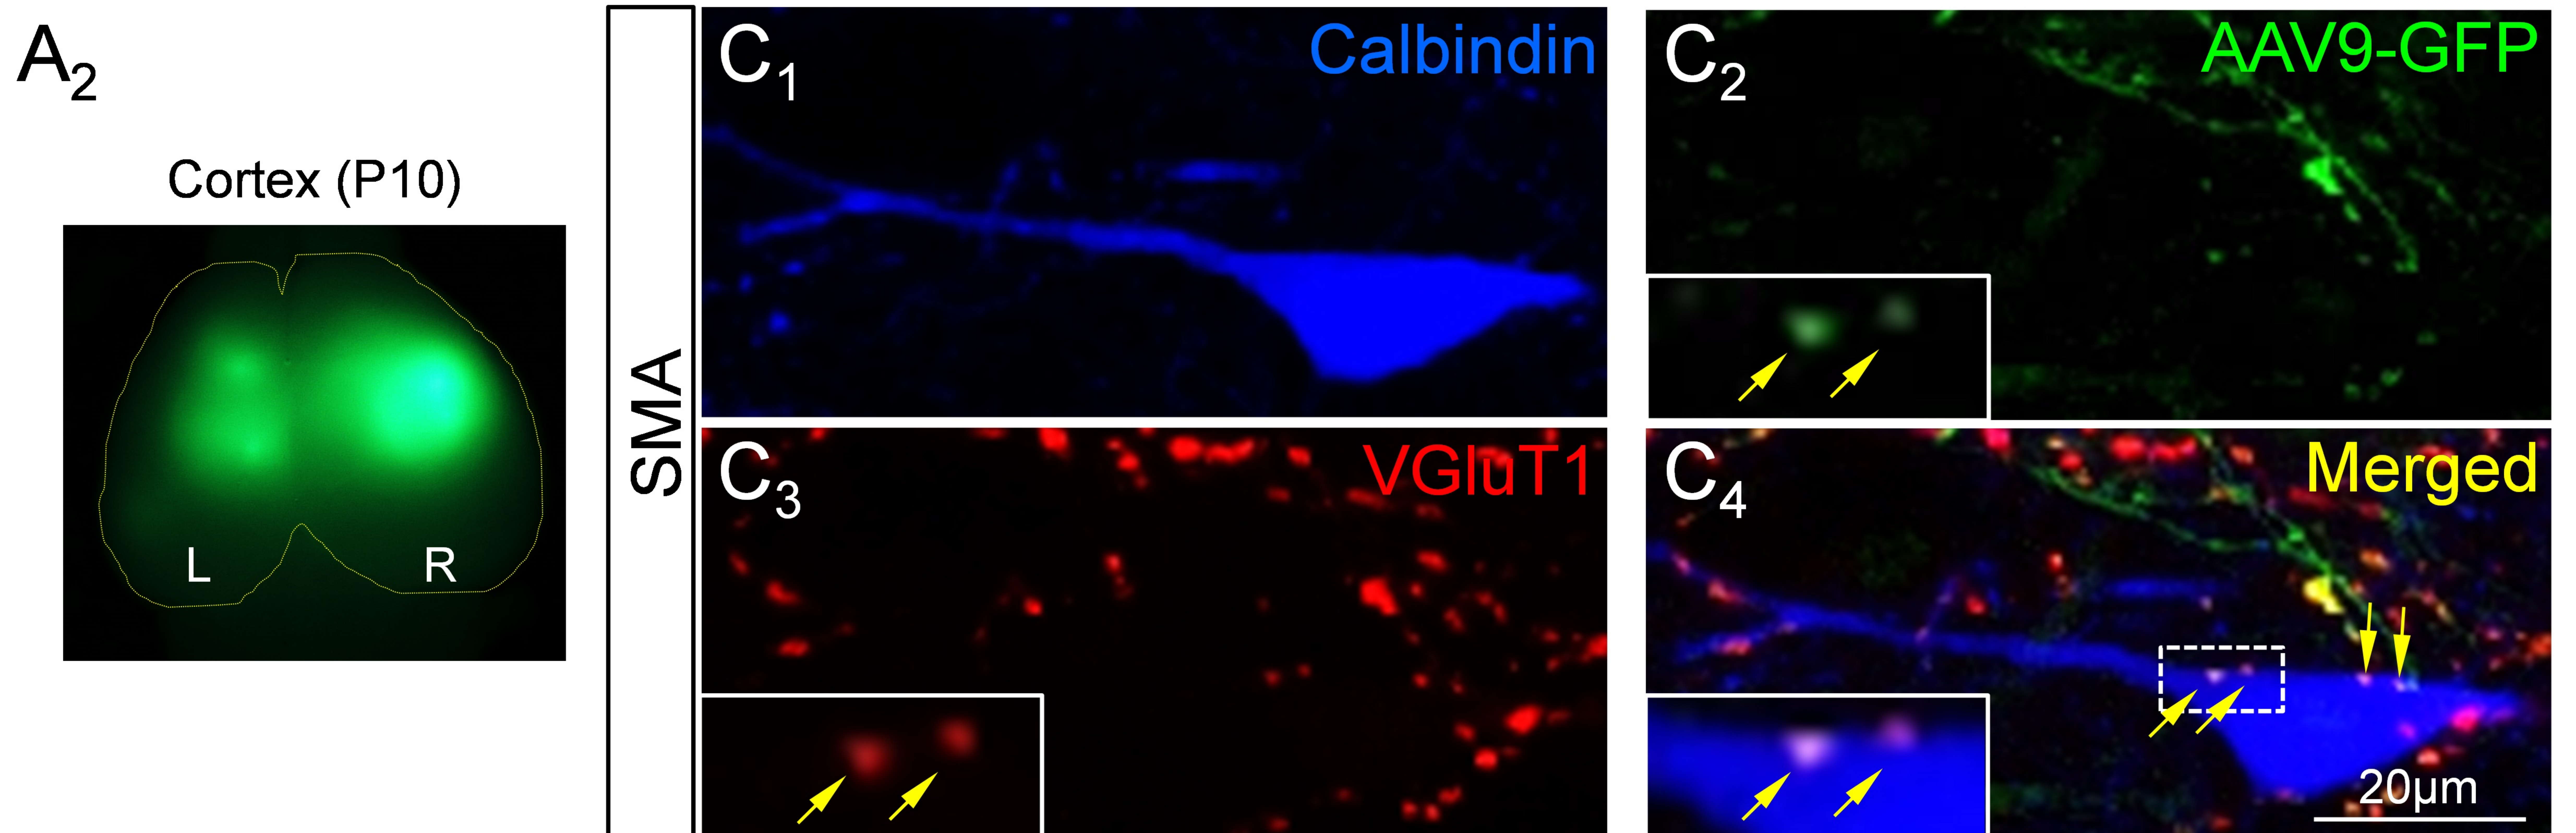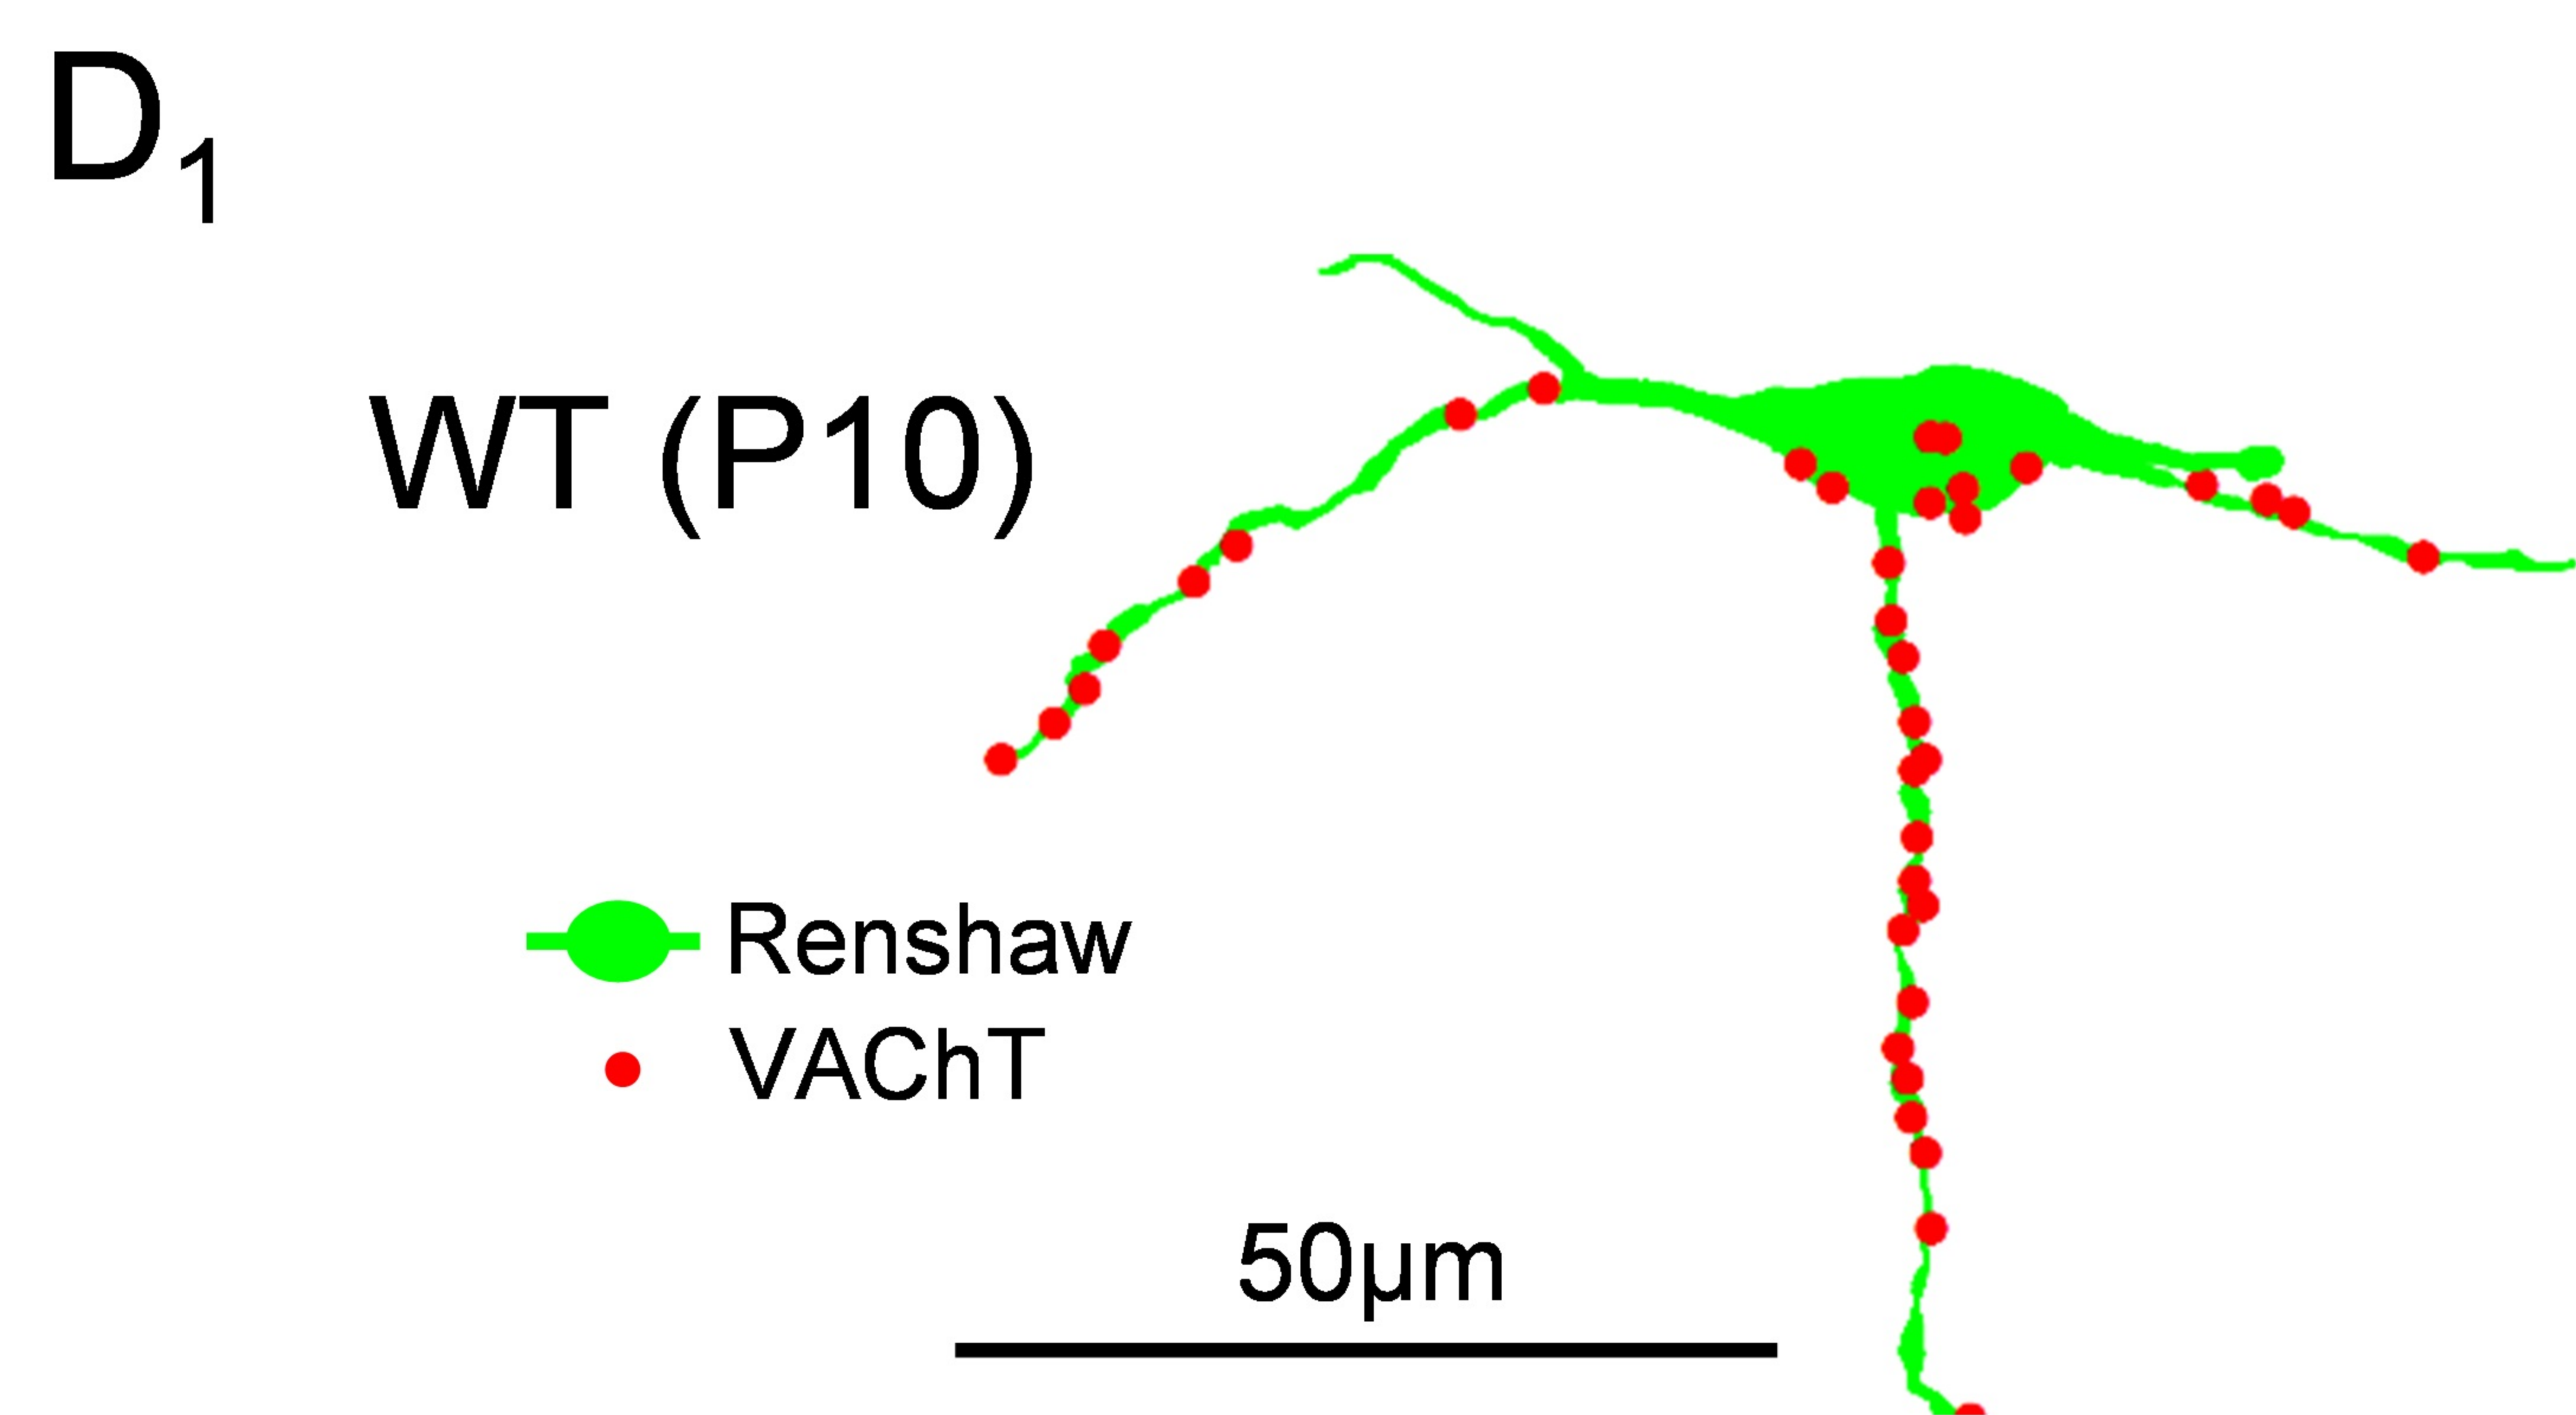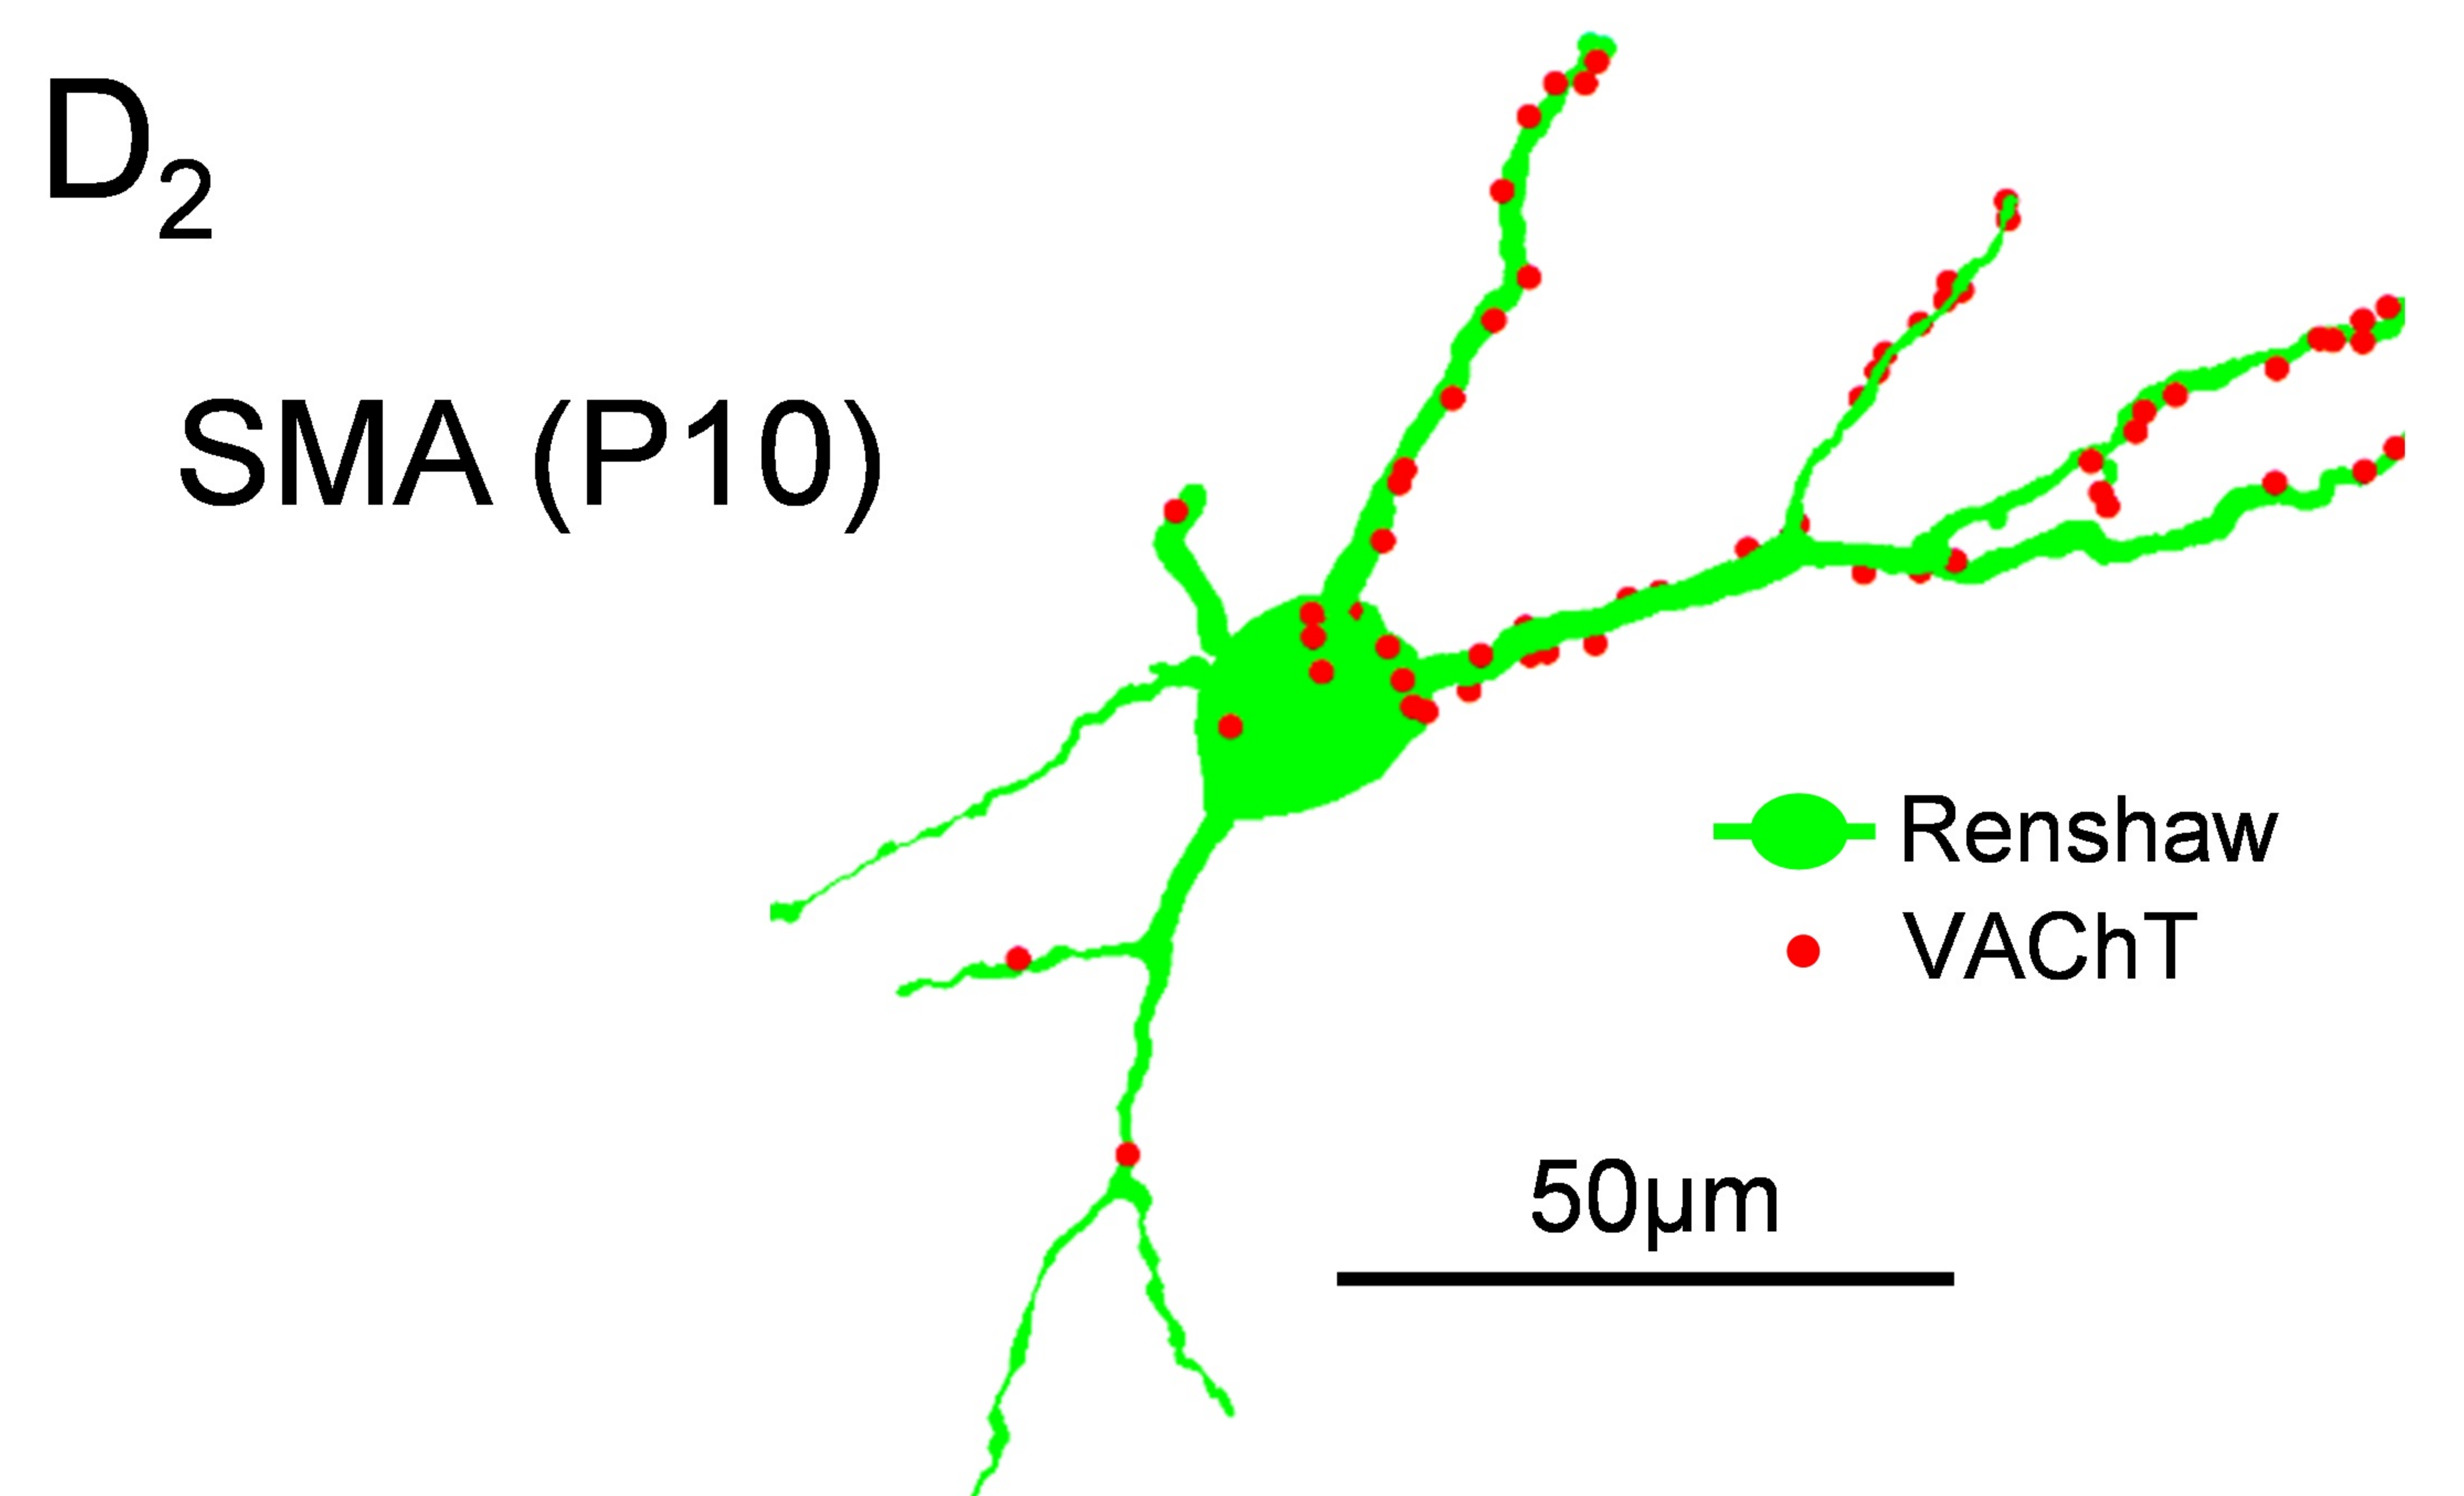

**E** Without transection

VChT soma density

VChT dendritic density

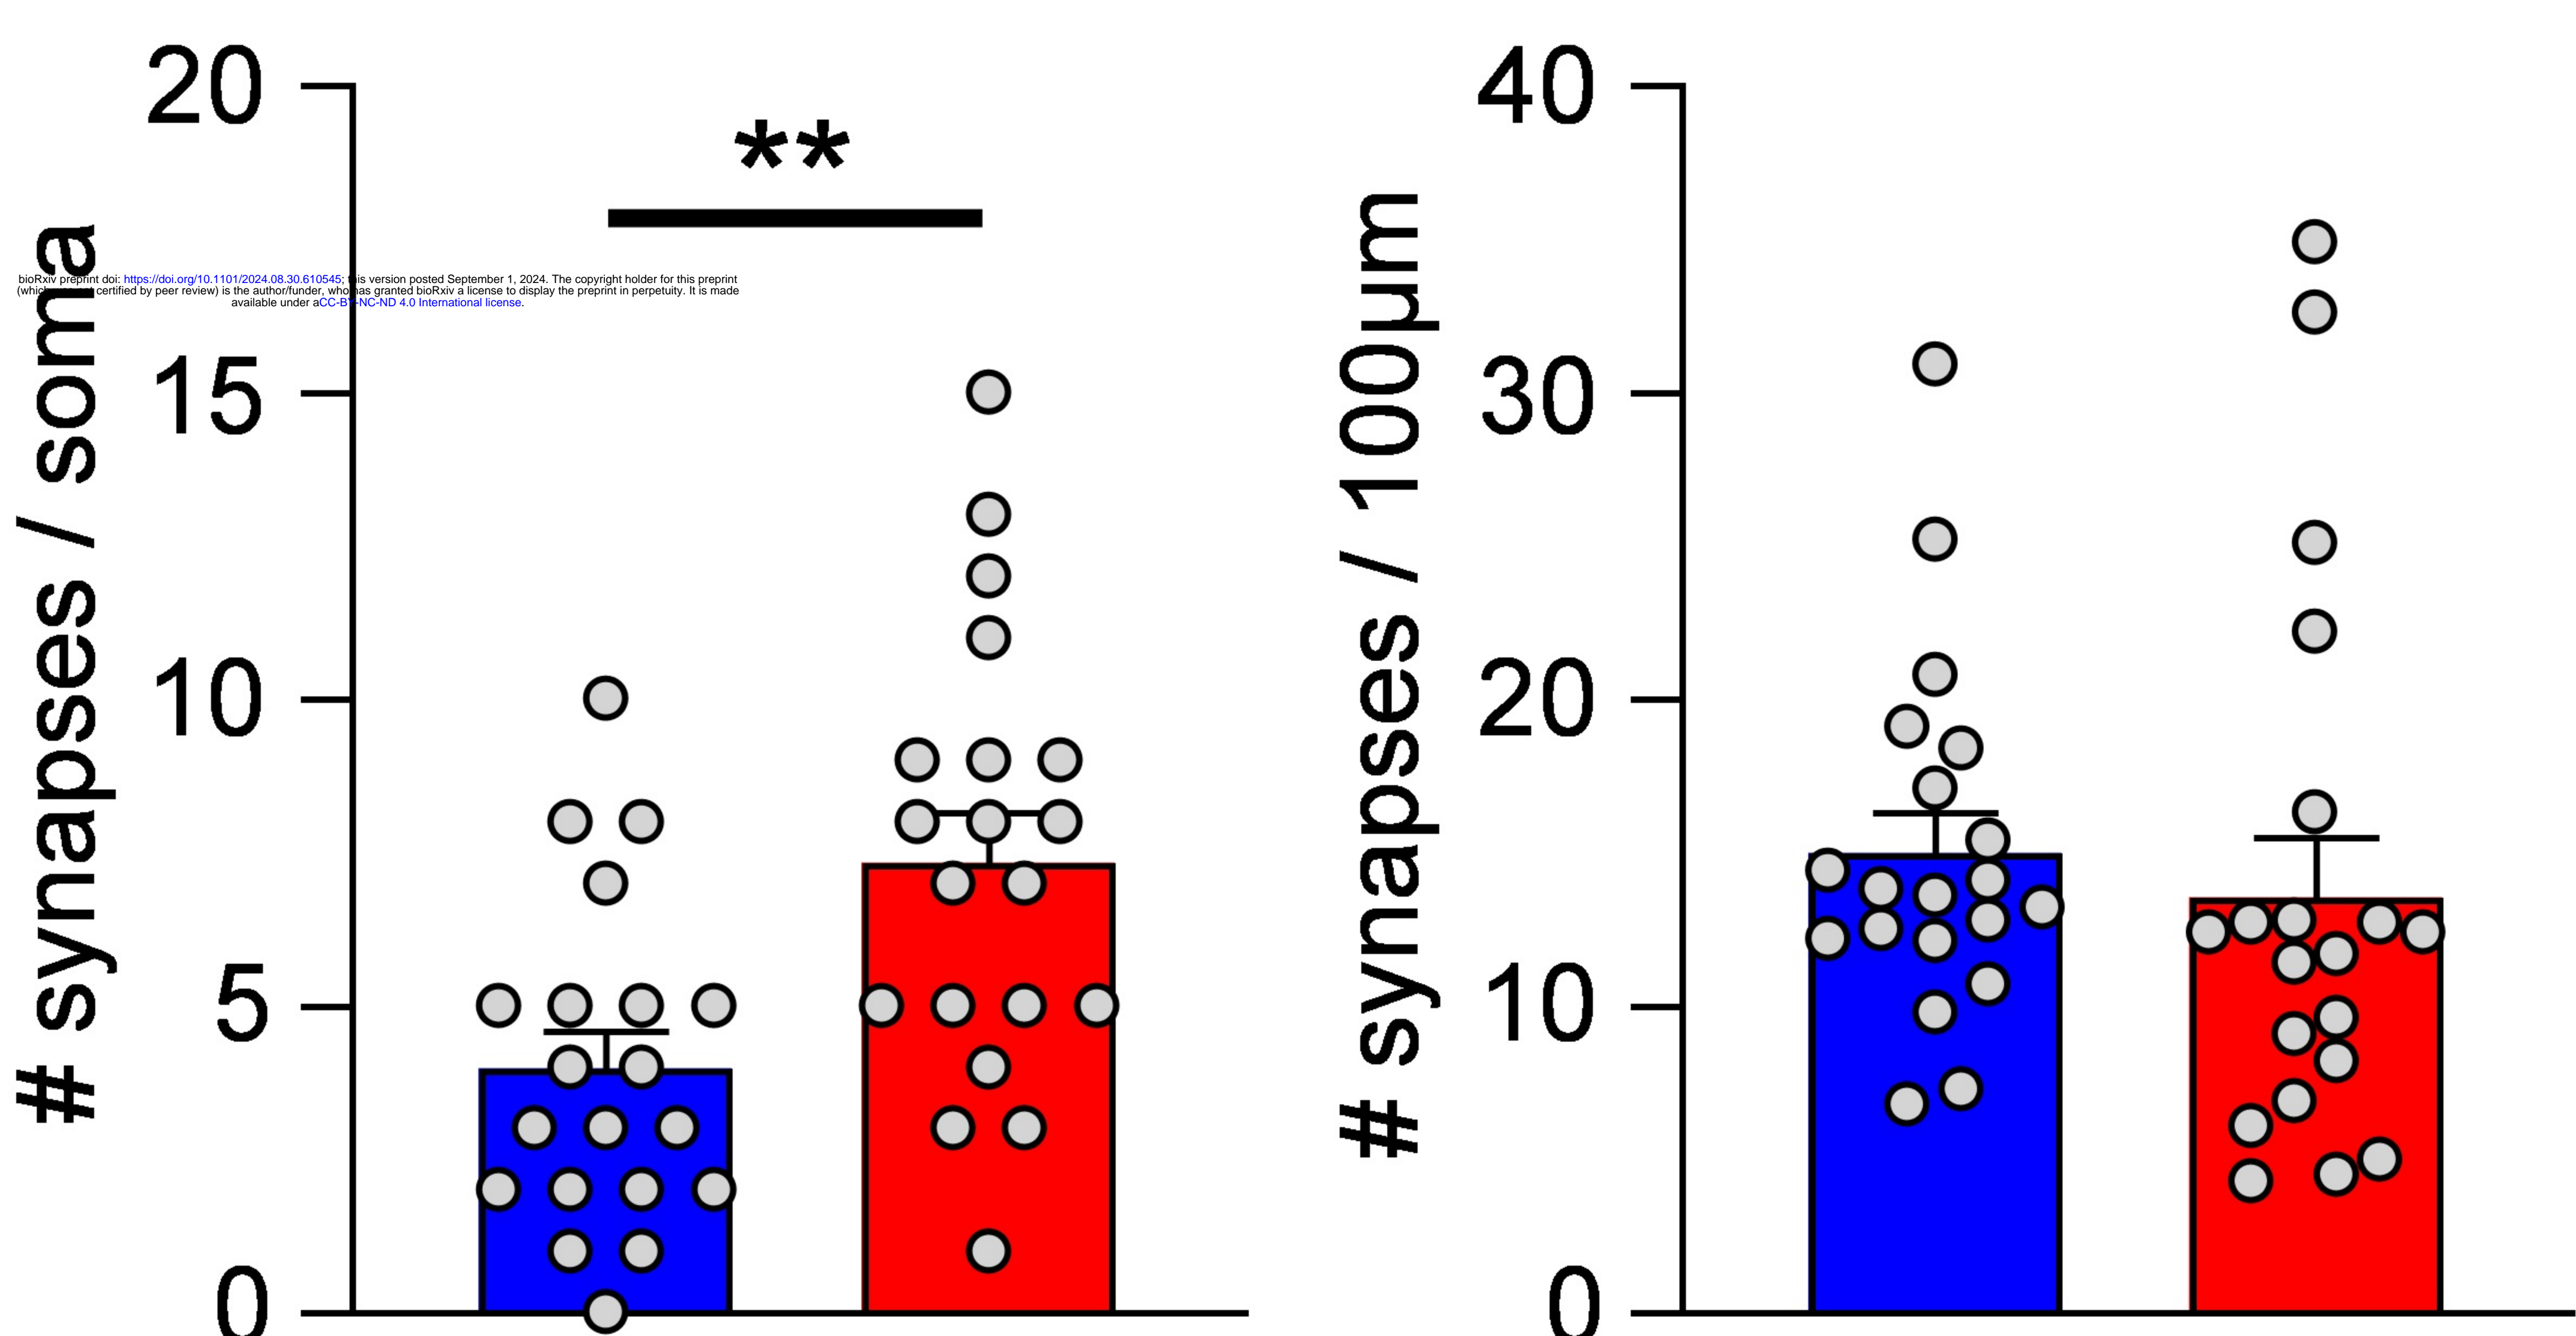

**F** After transection

VChT soma density

VChT dendritic density

■ WT  
■ SMA

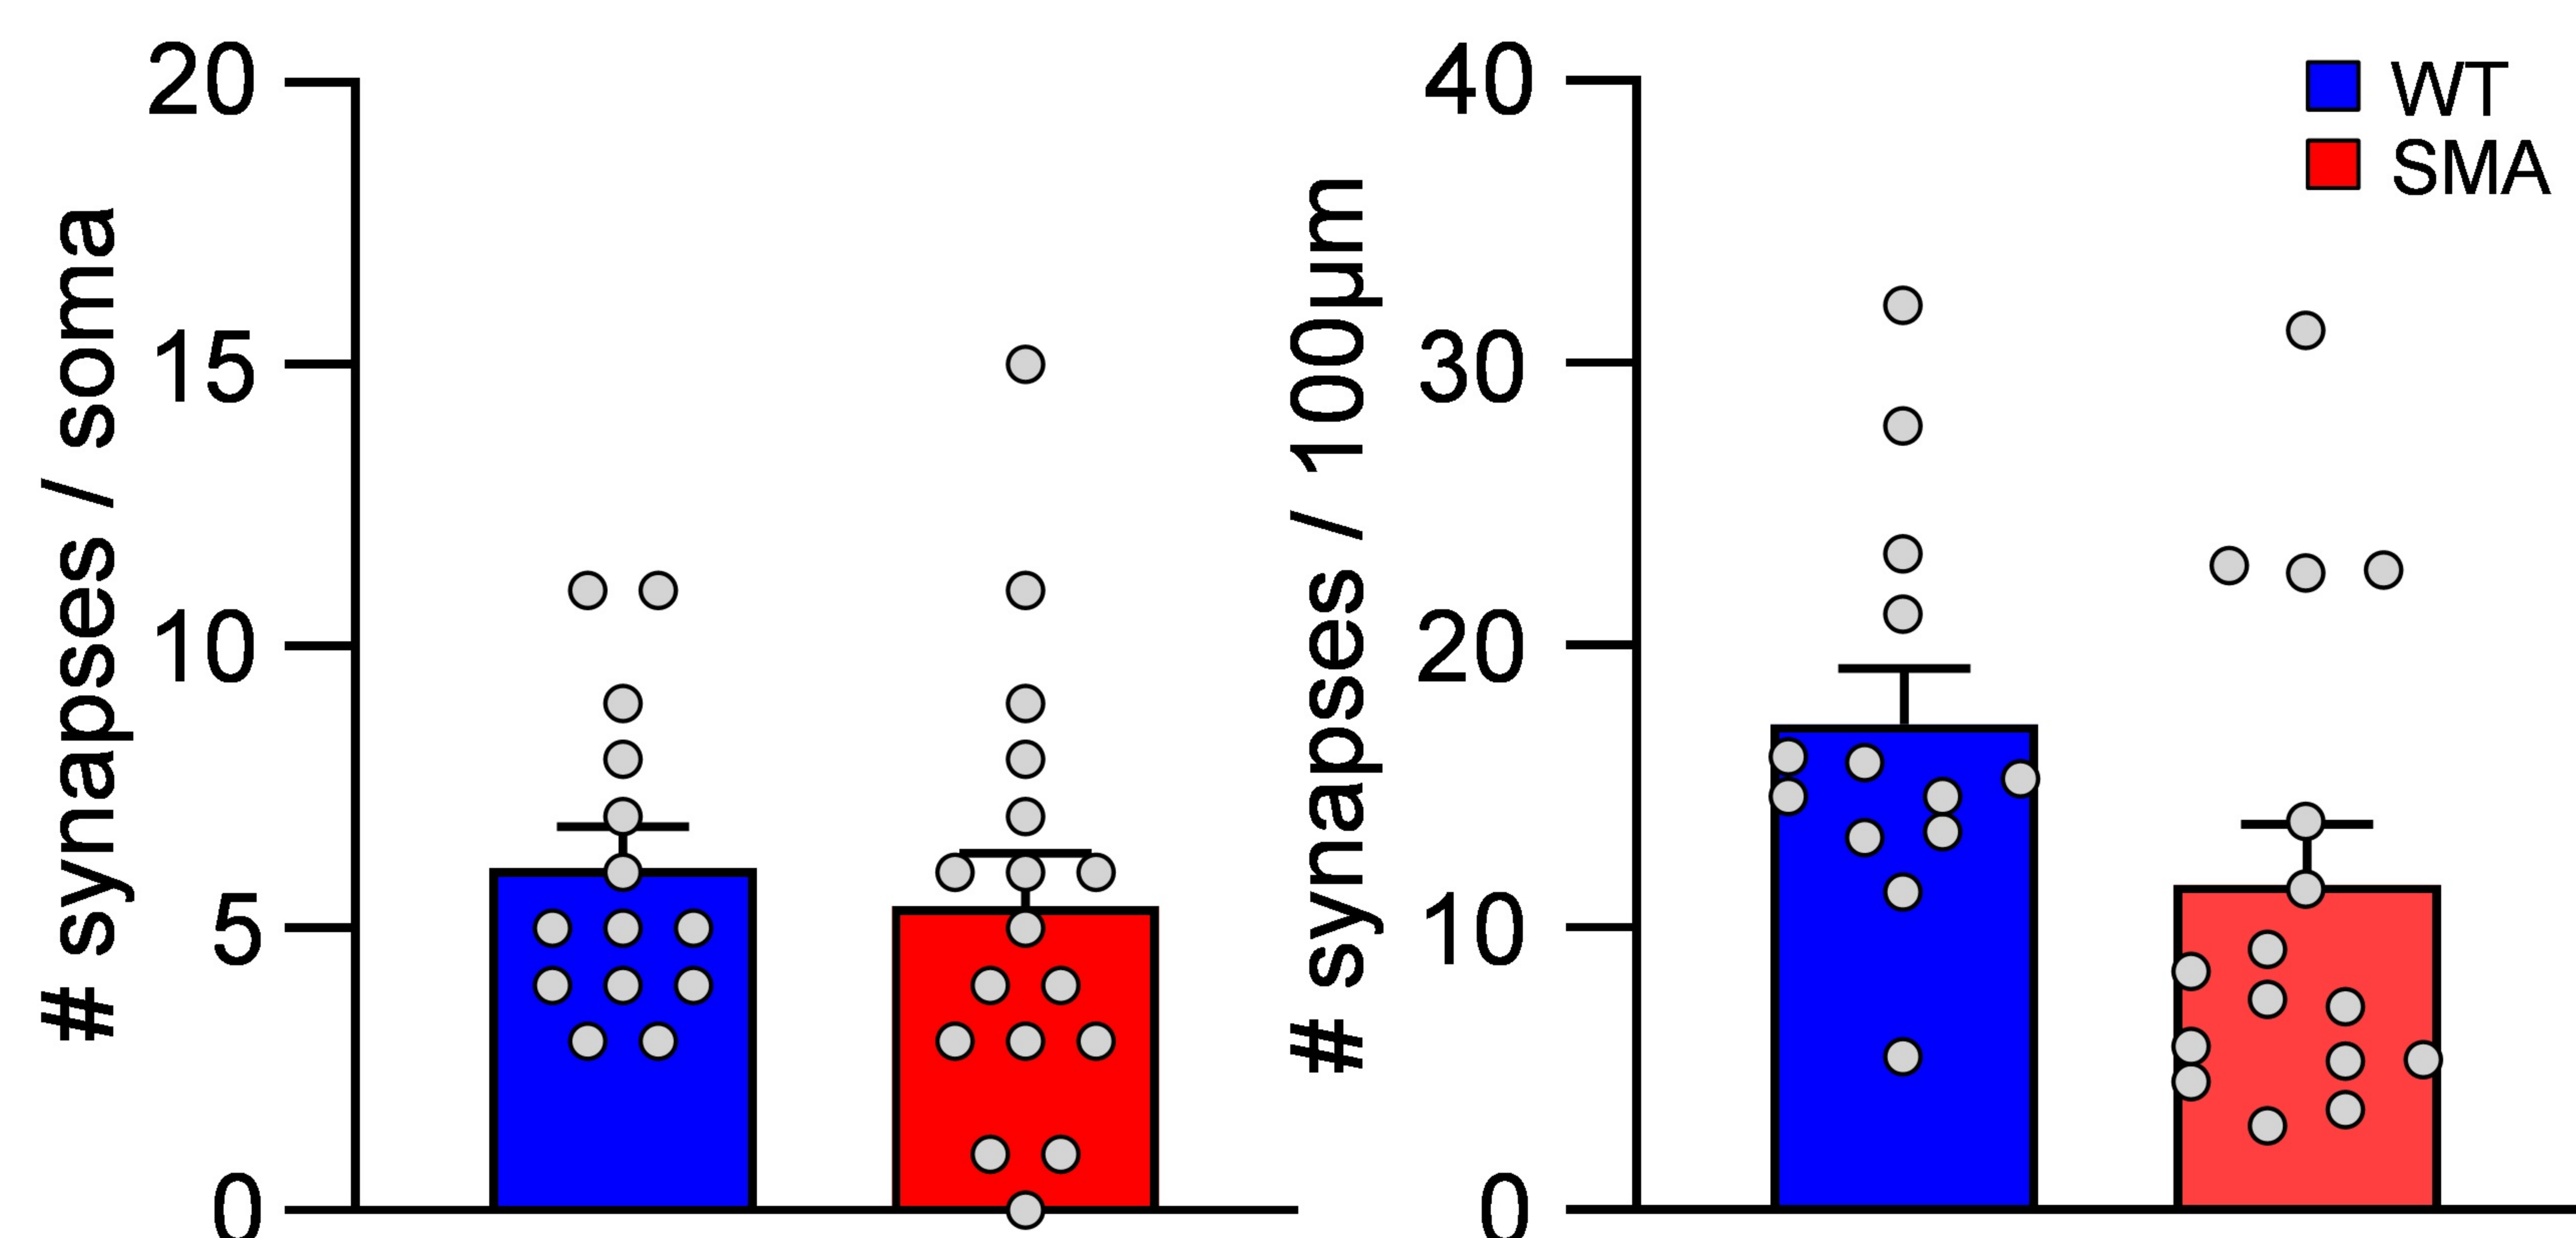

## Spinal interneurons (no DR or VR monosynaptic activation)

■ WT  
■ SMA

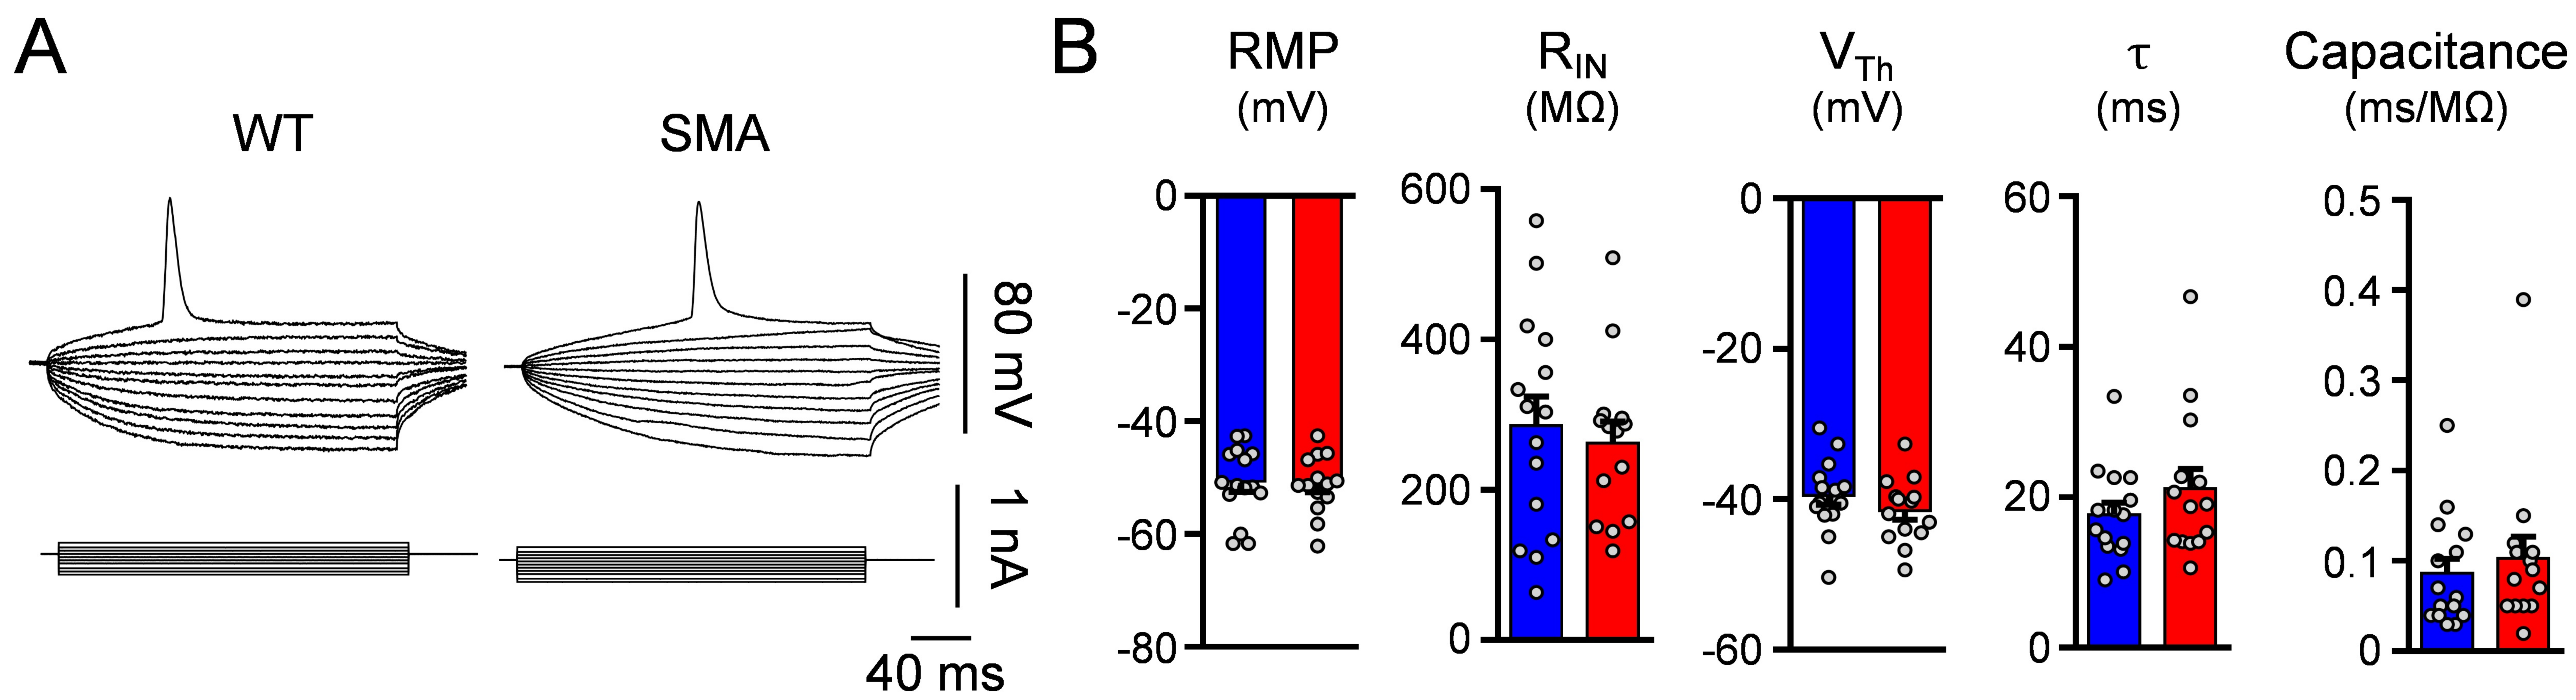

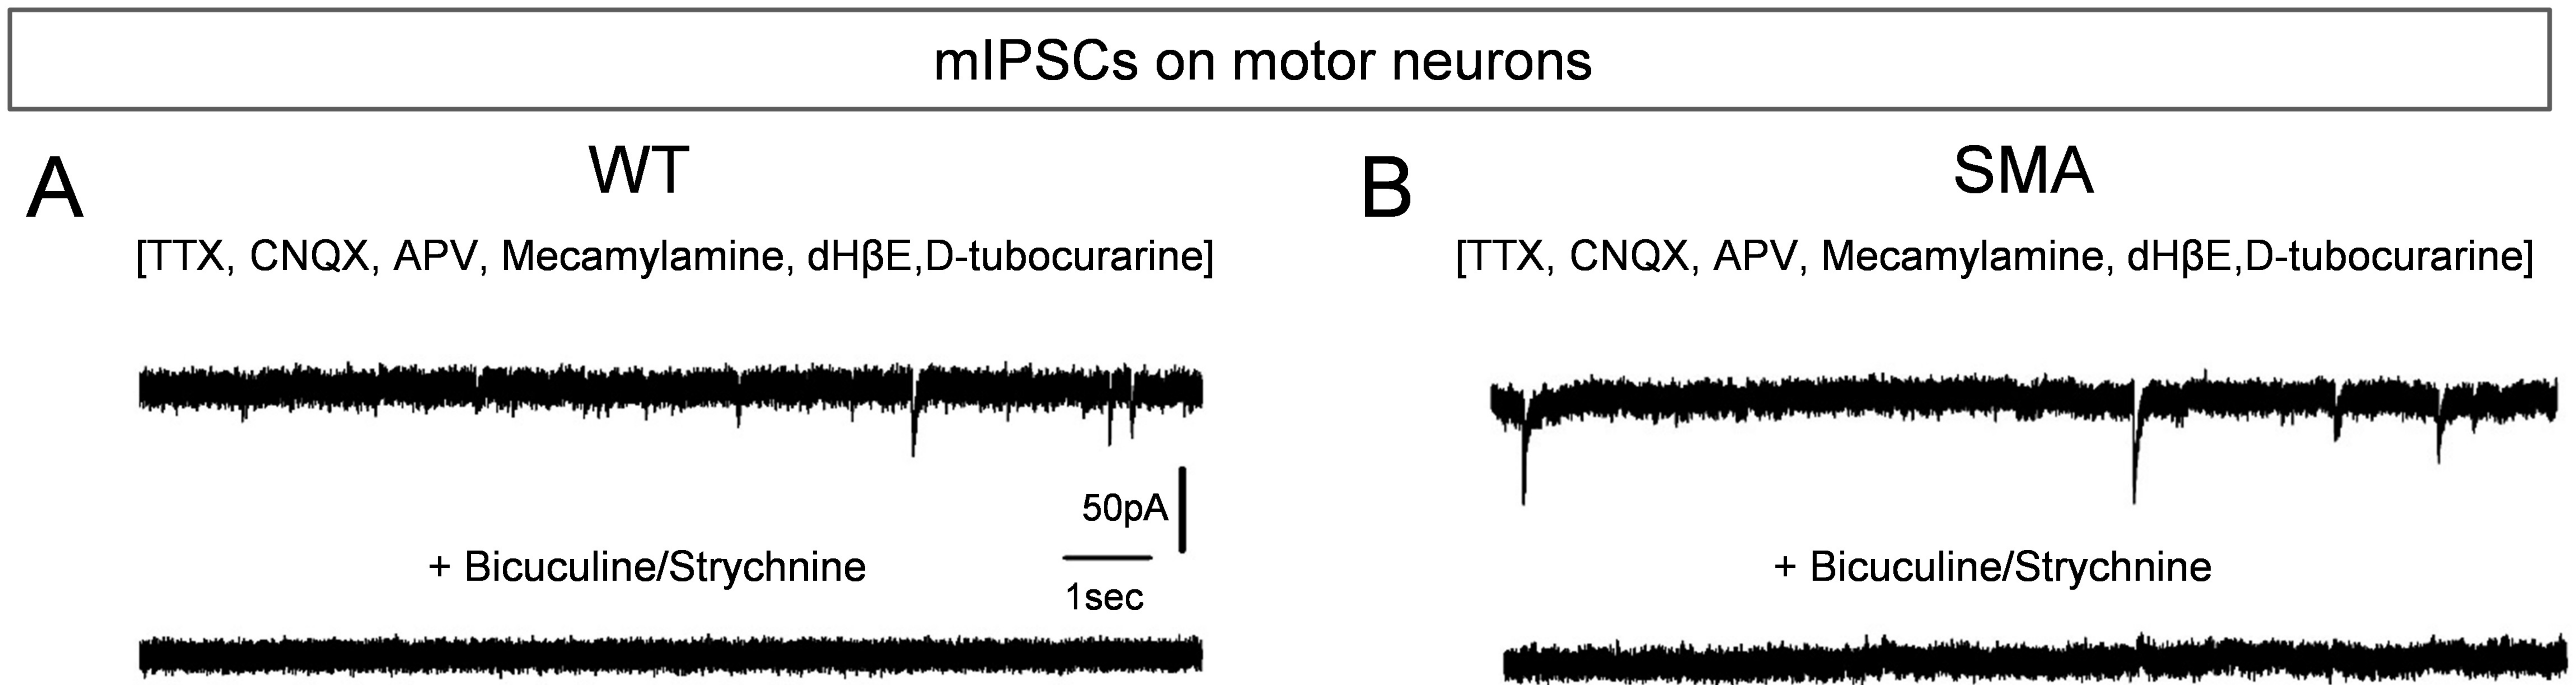

A

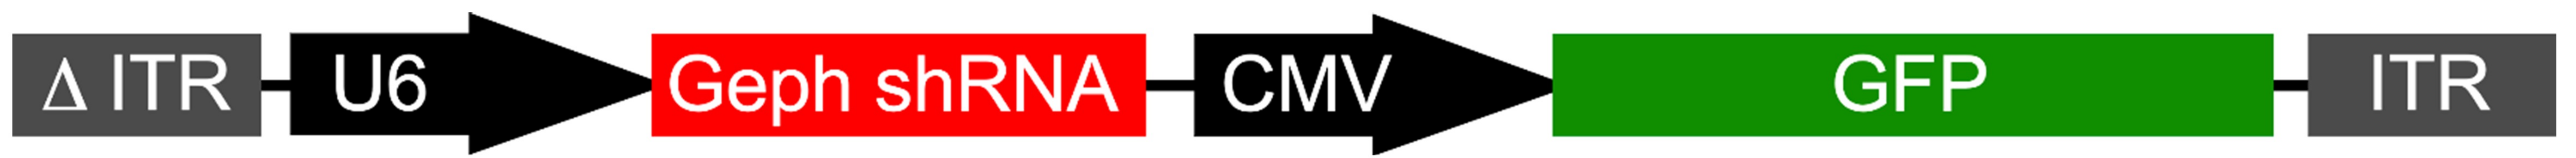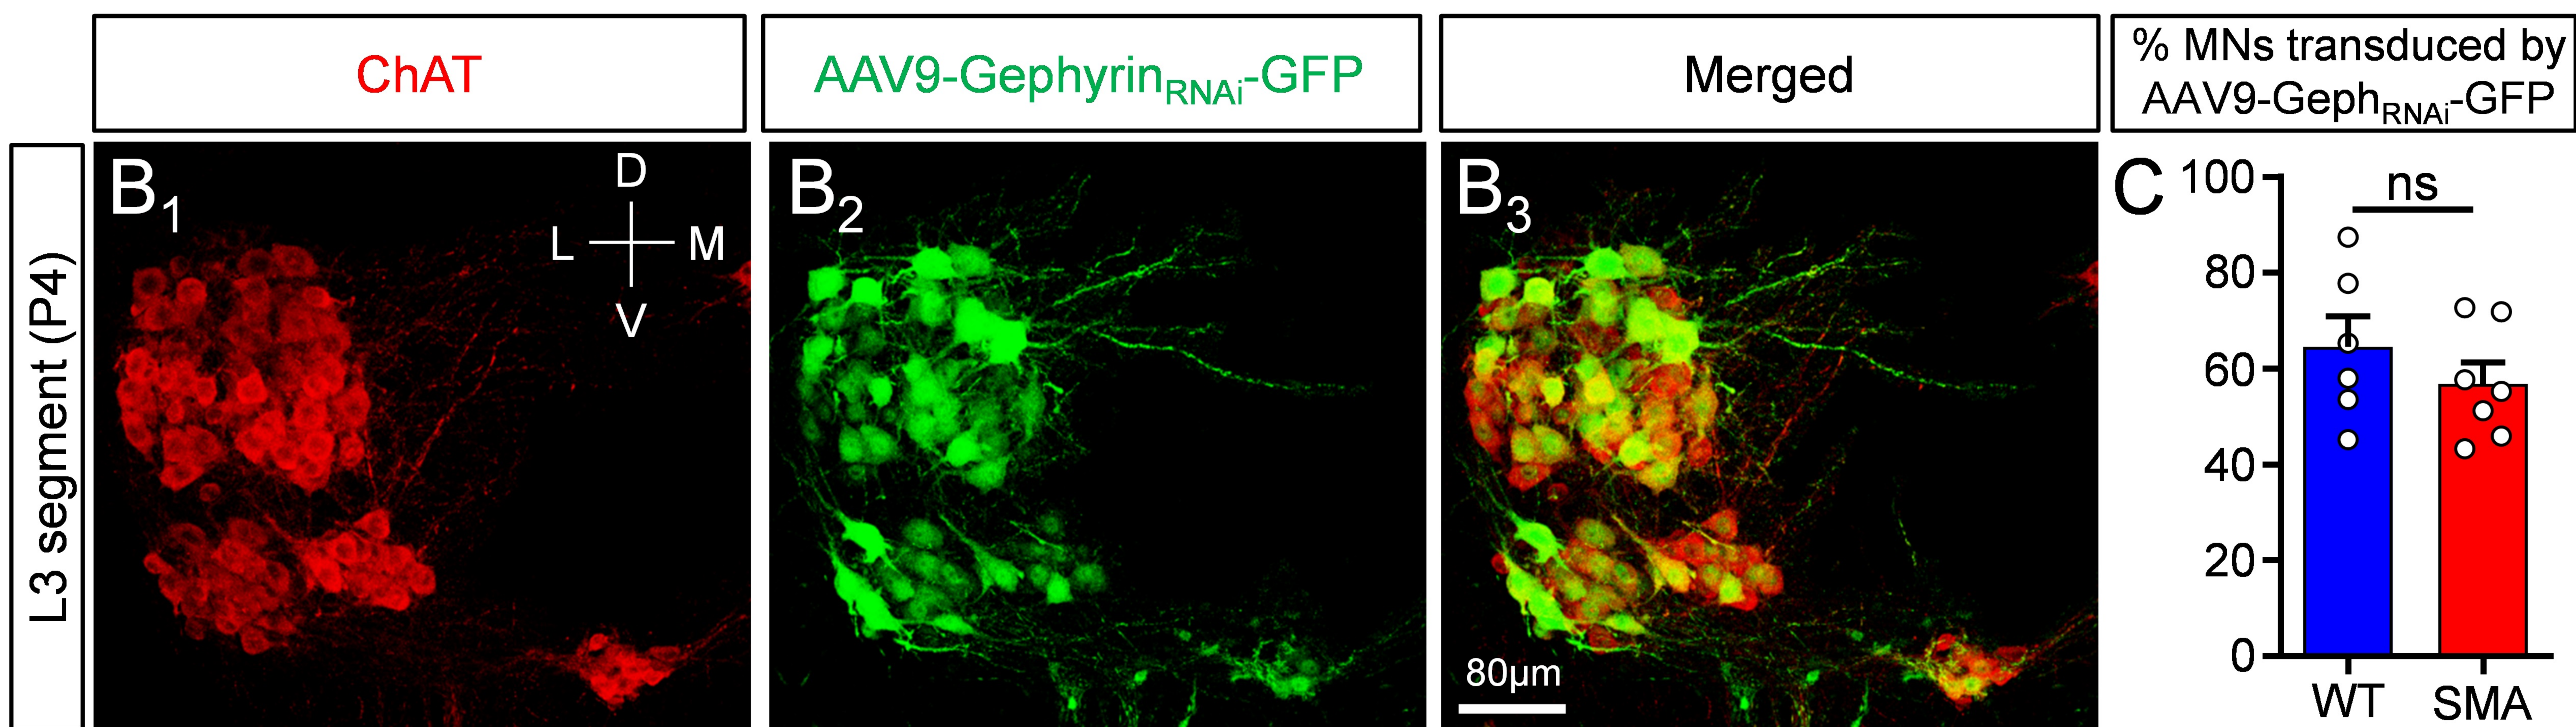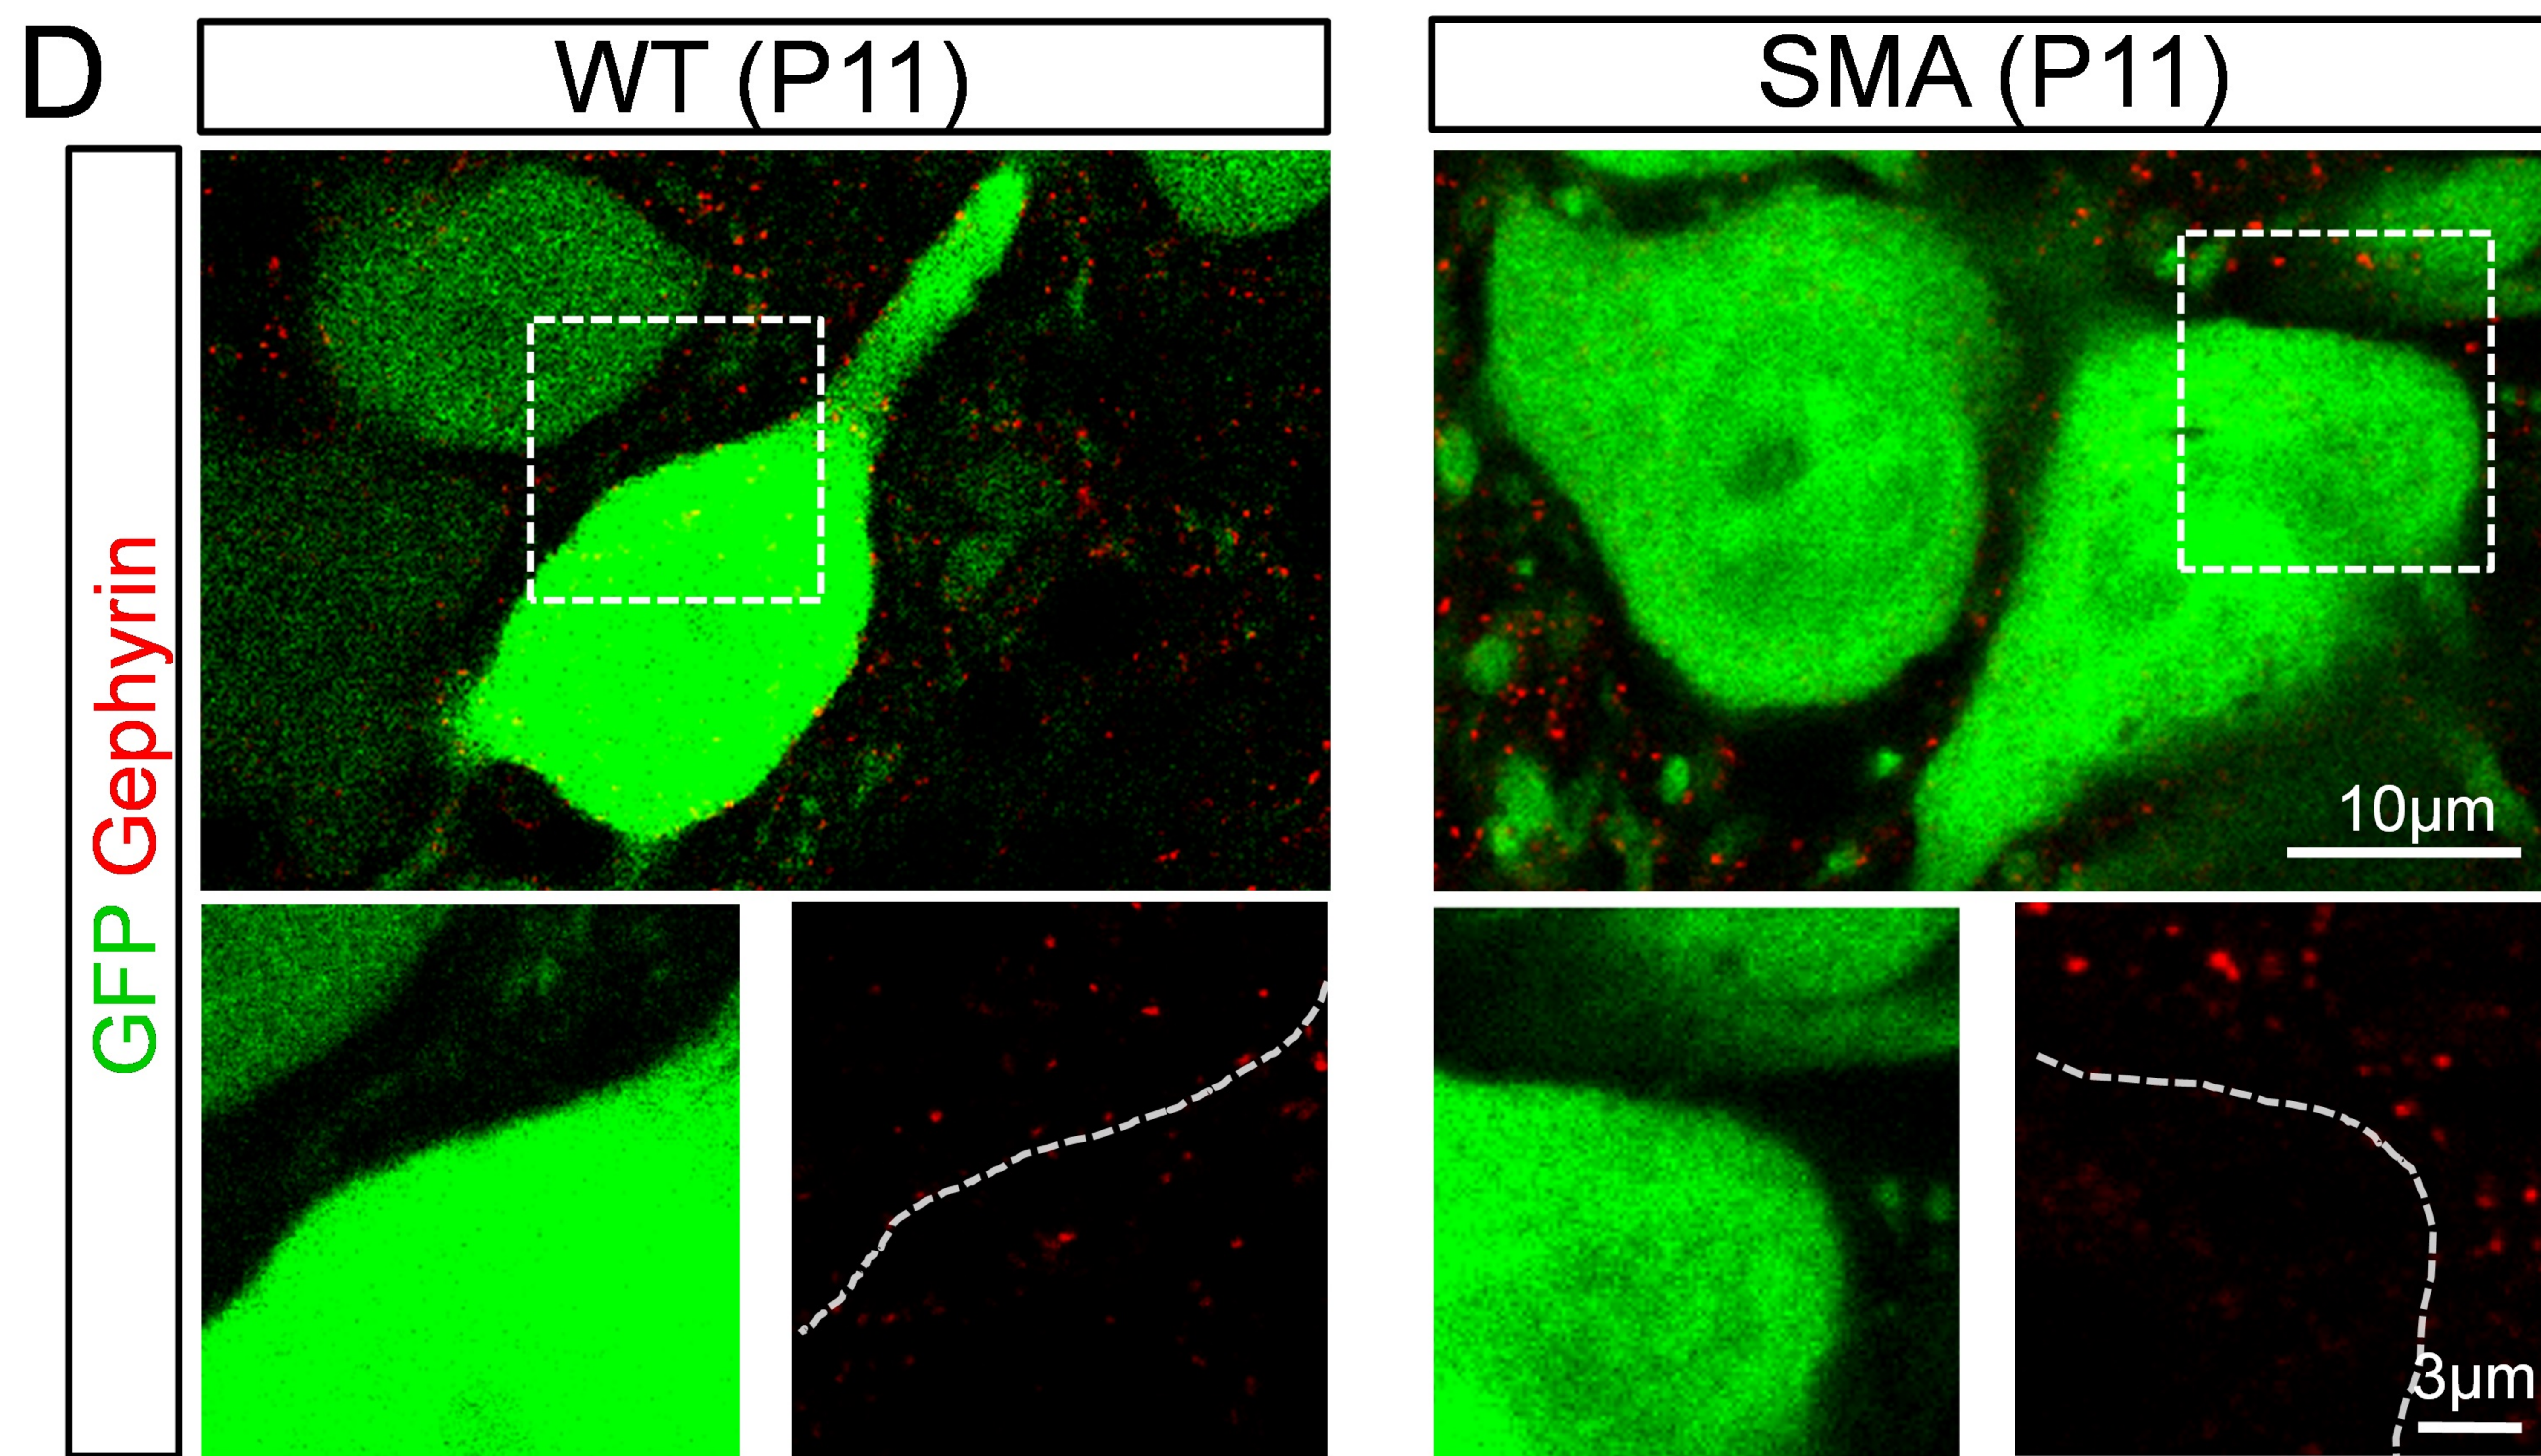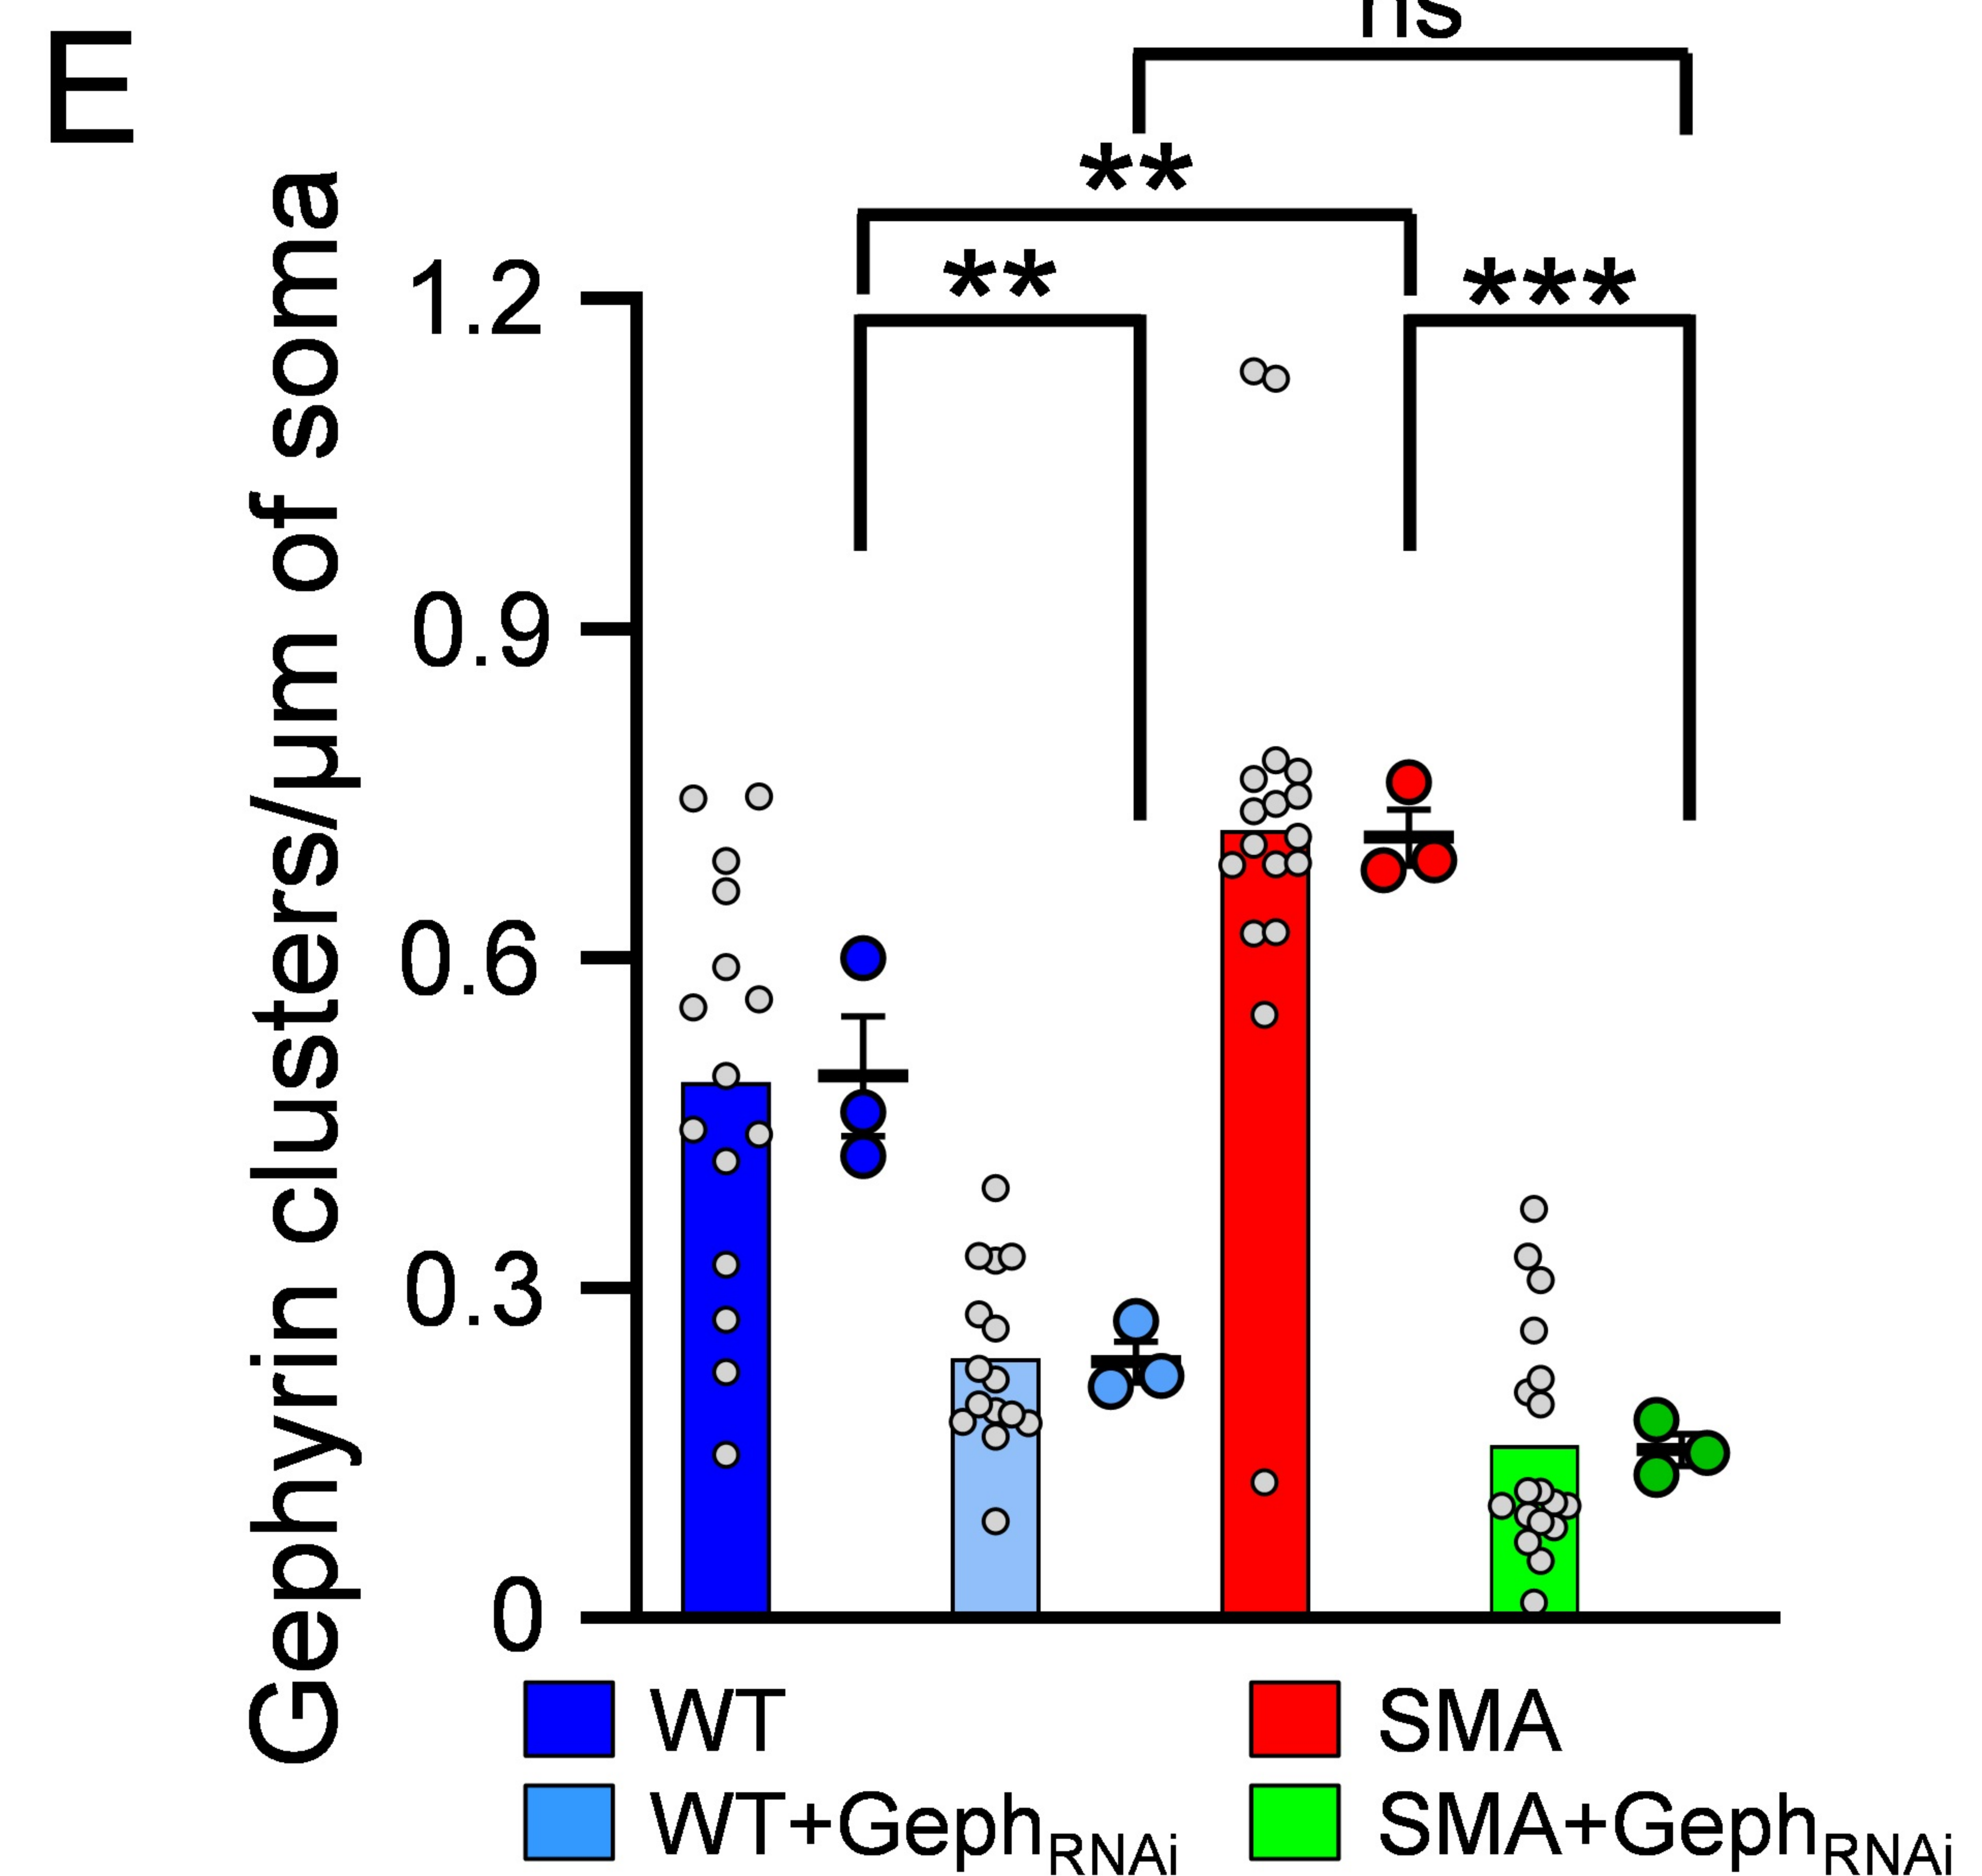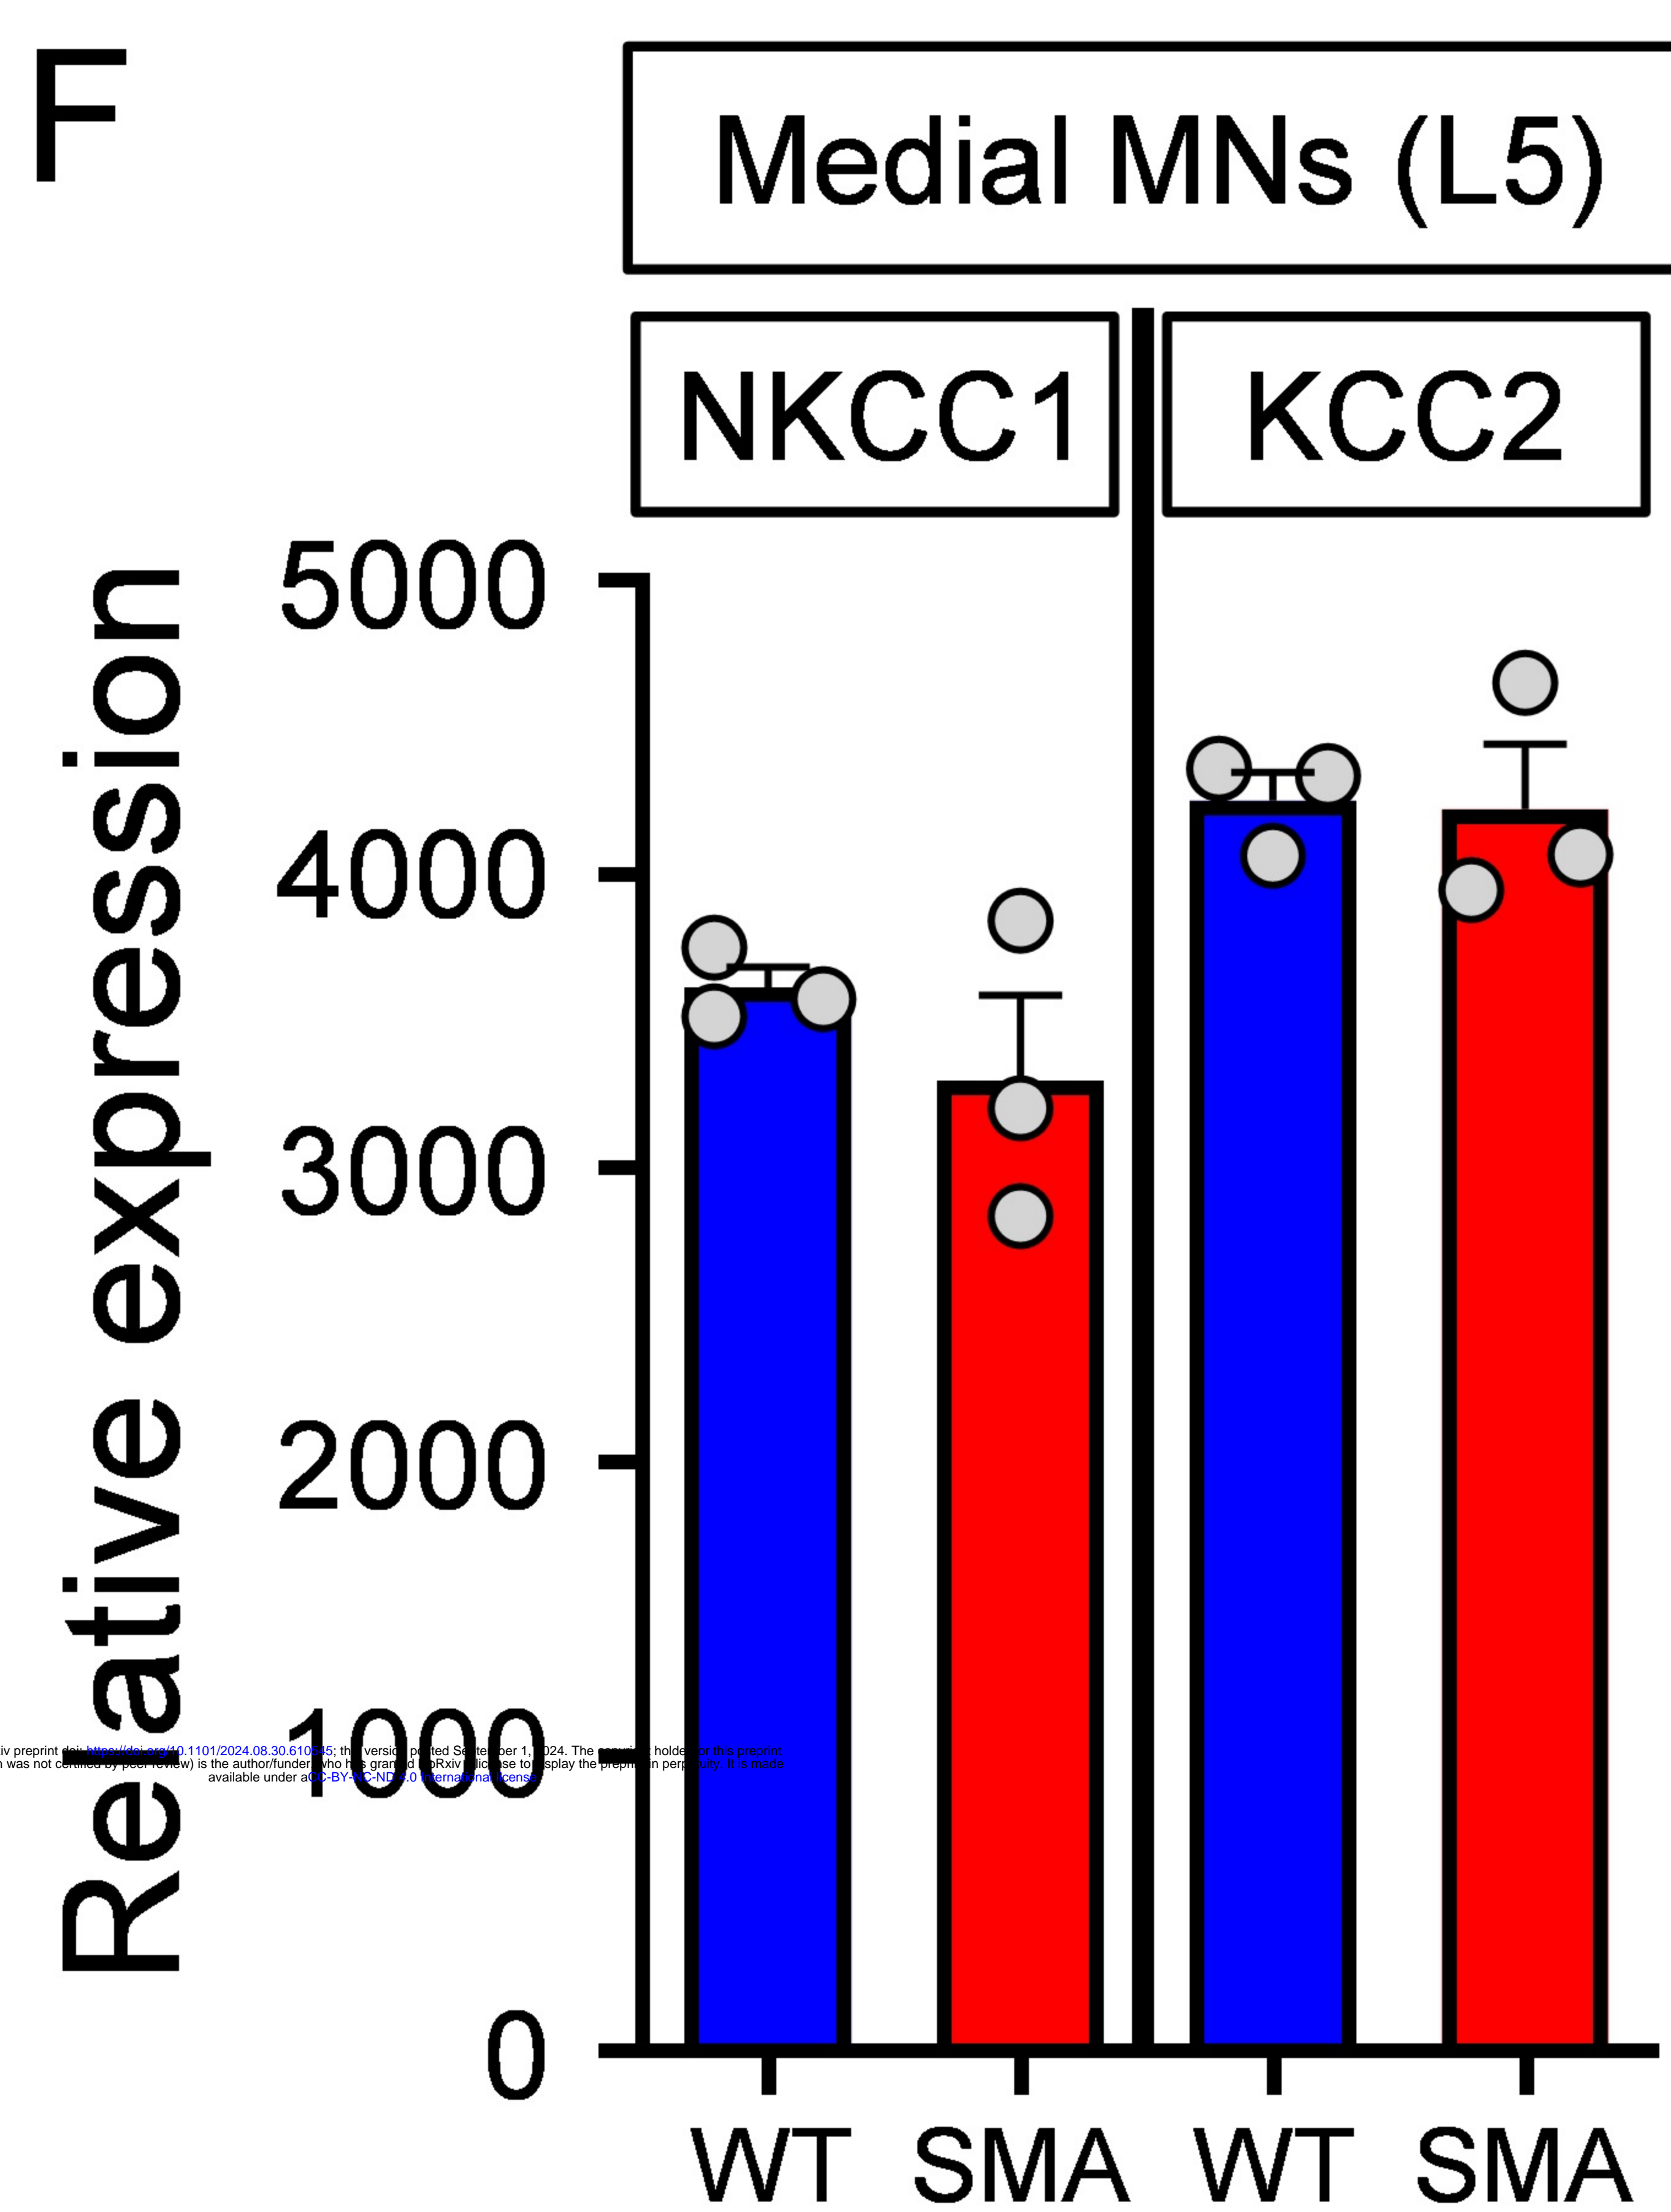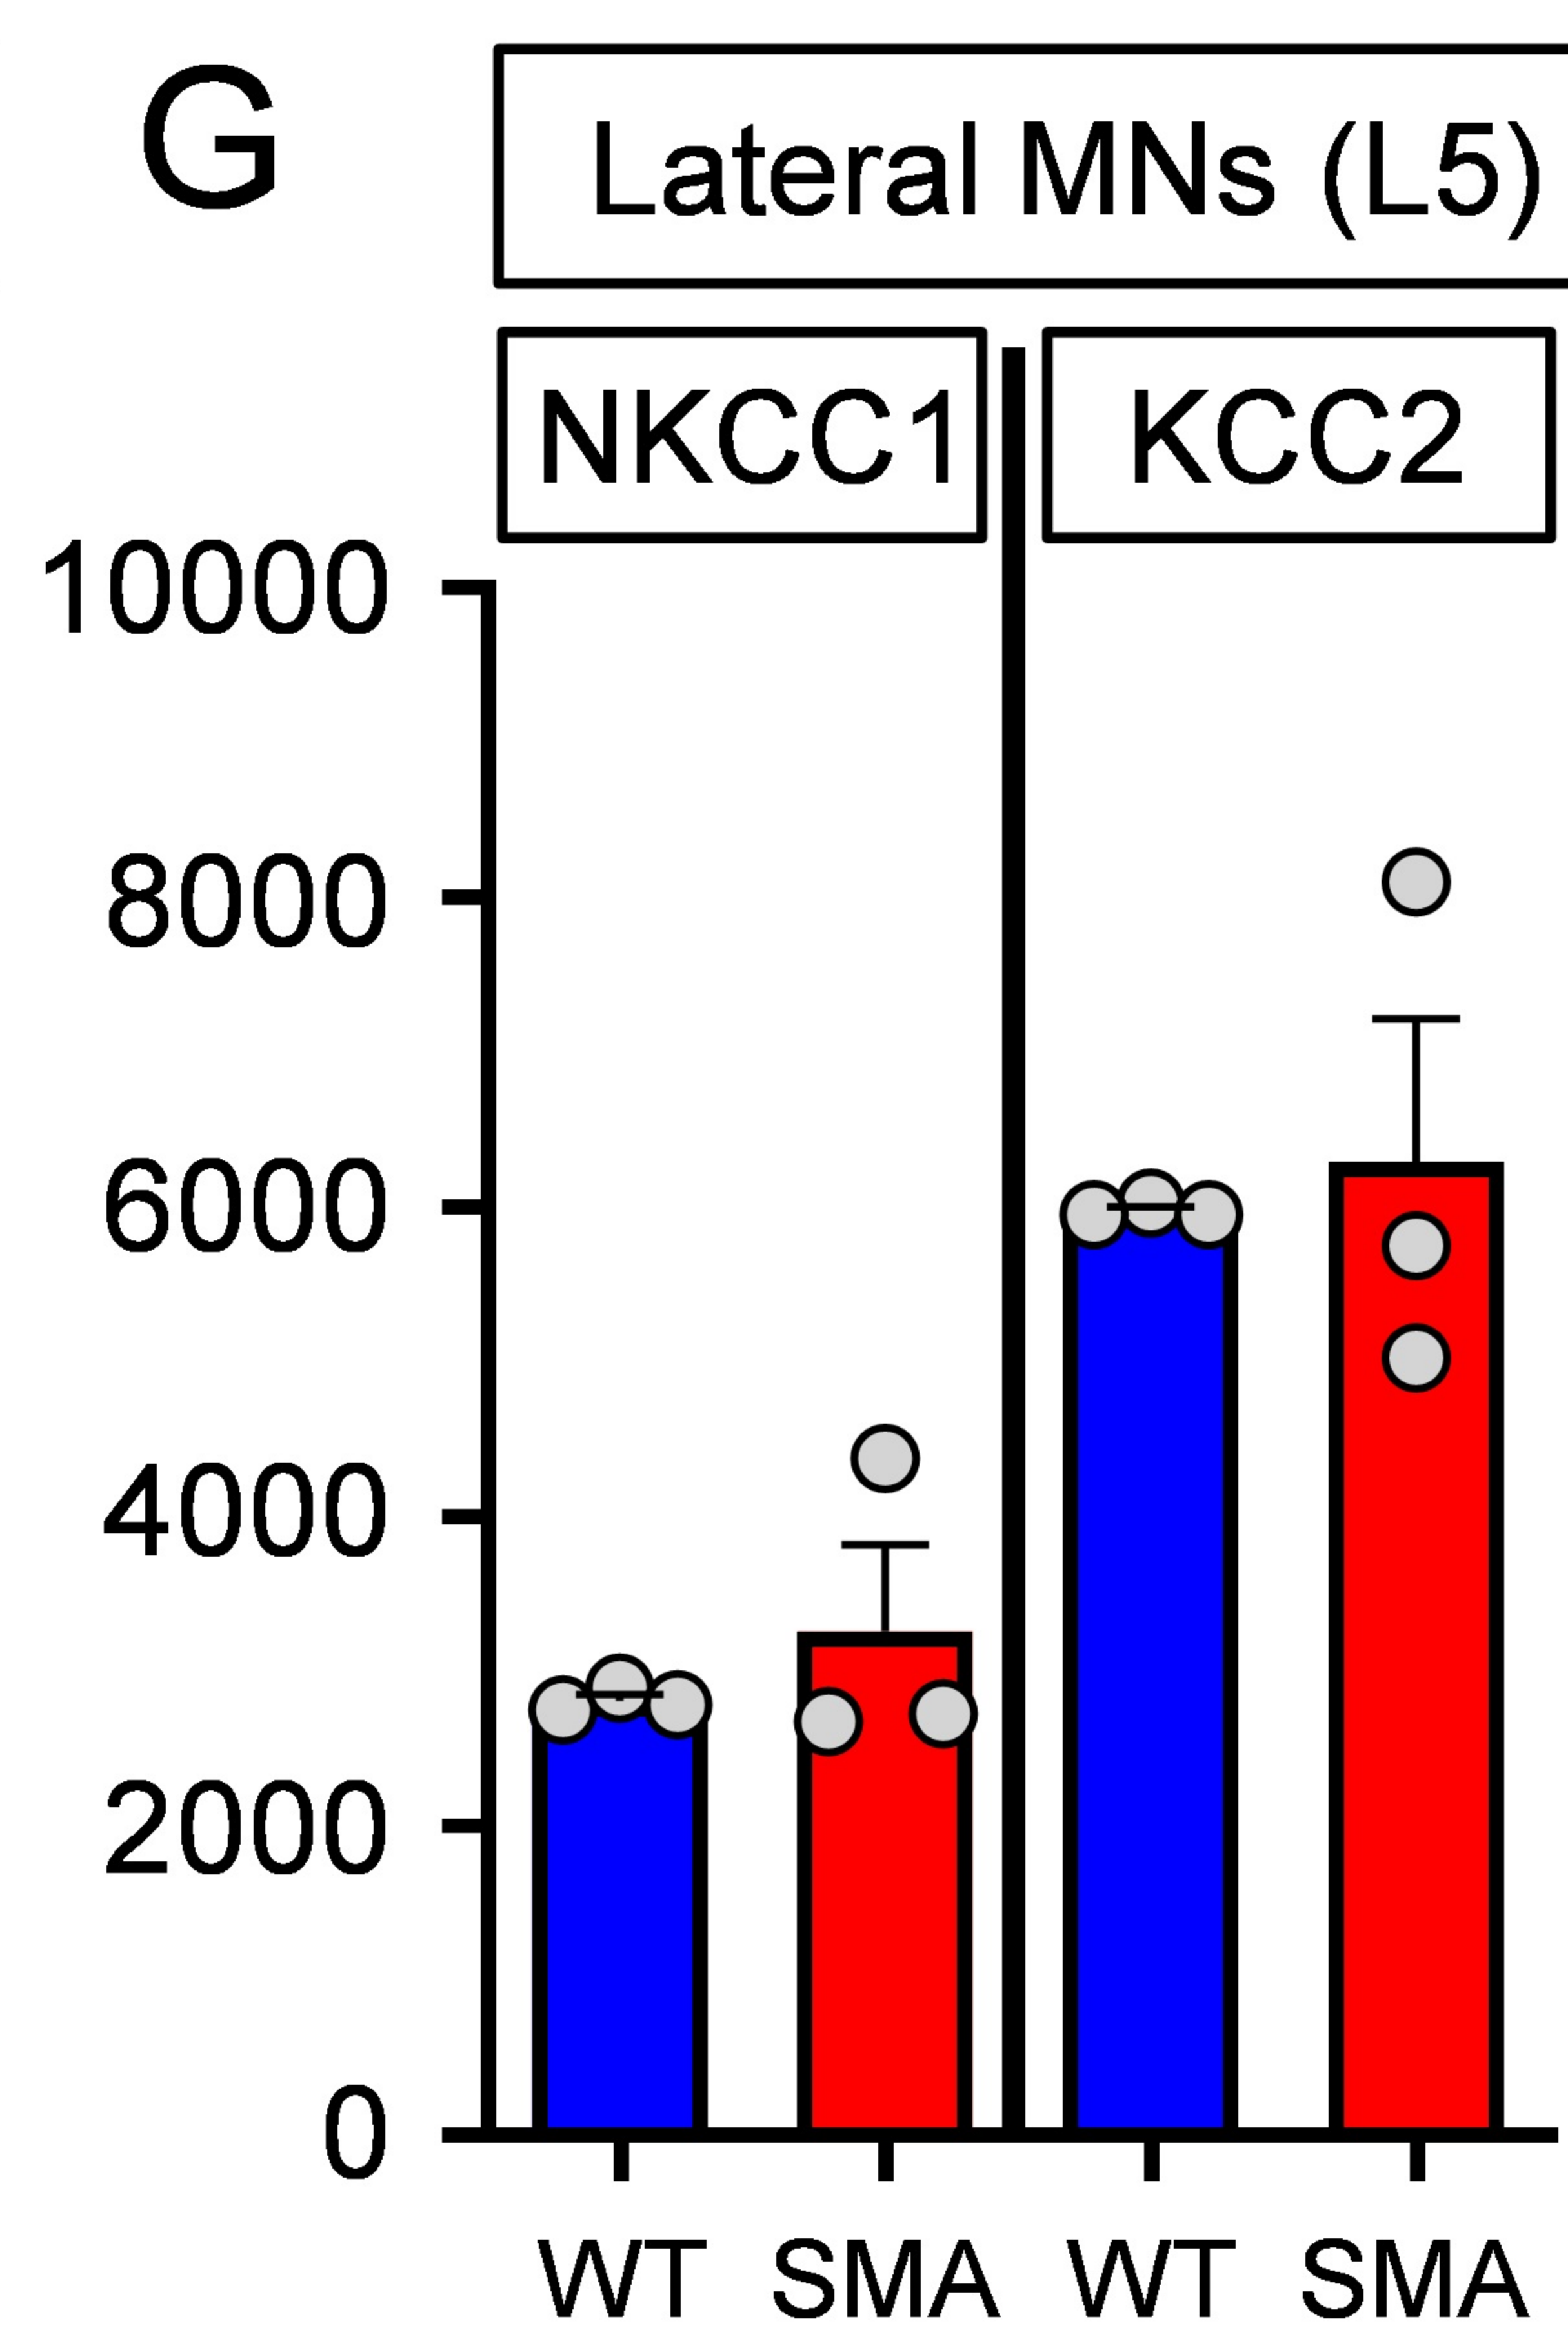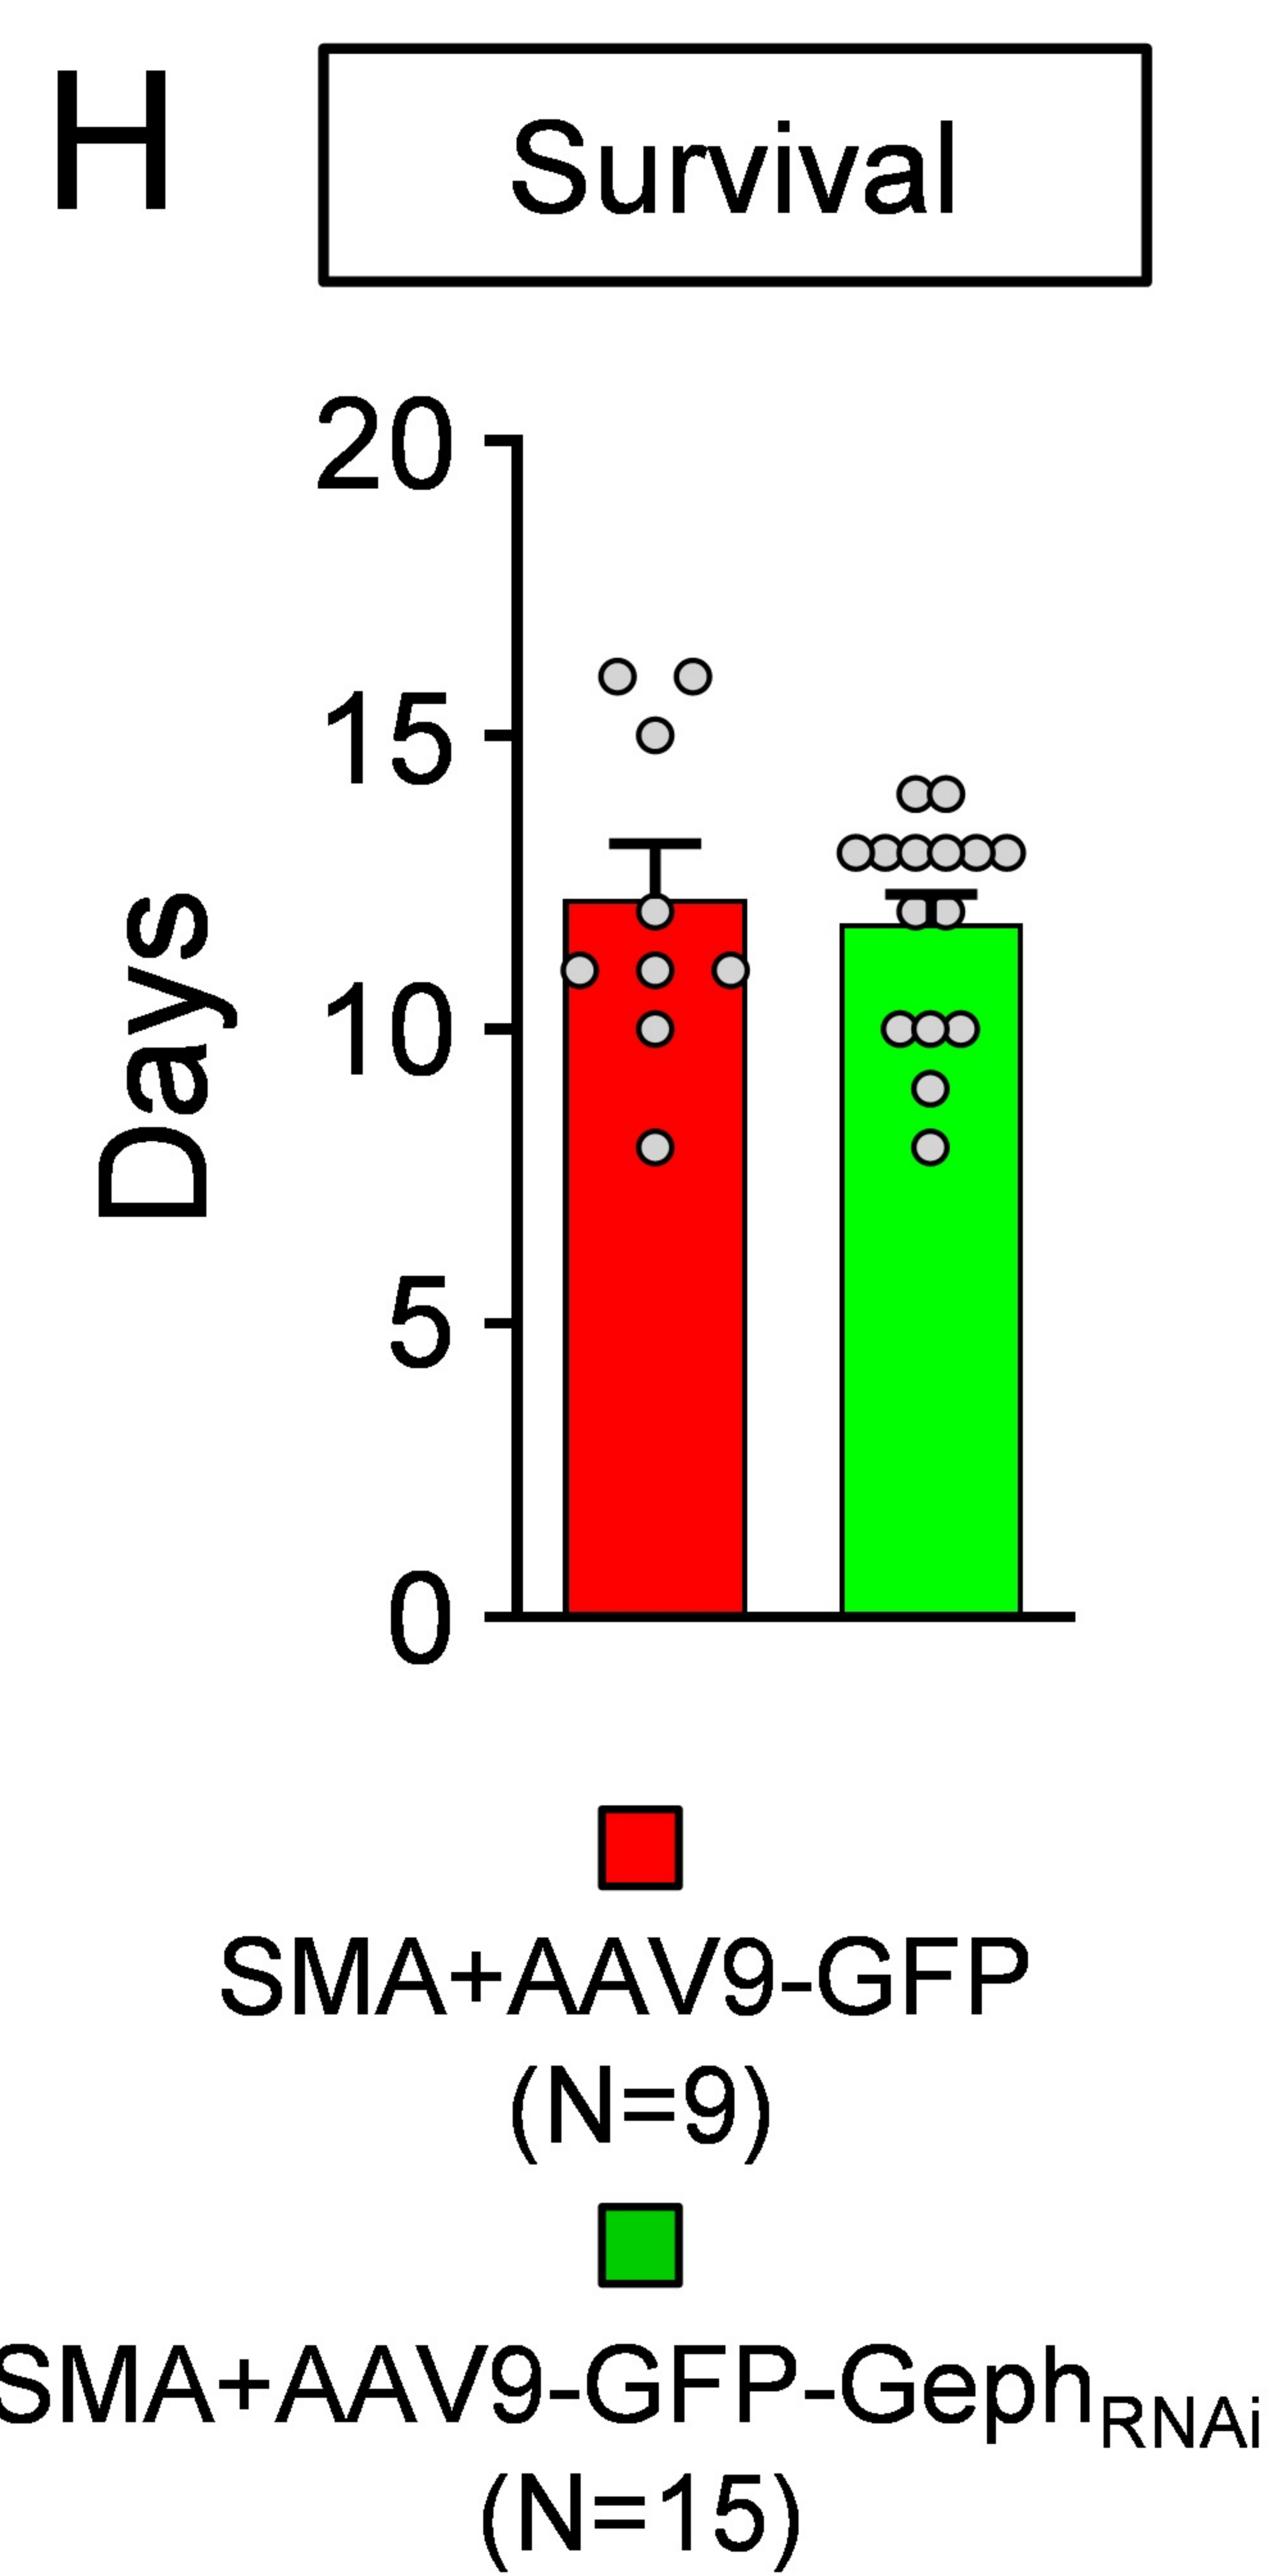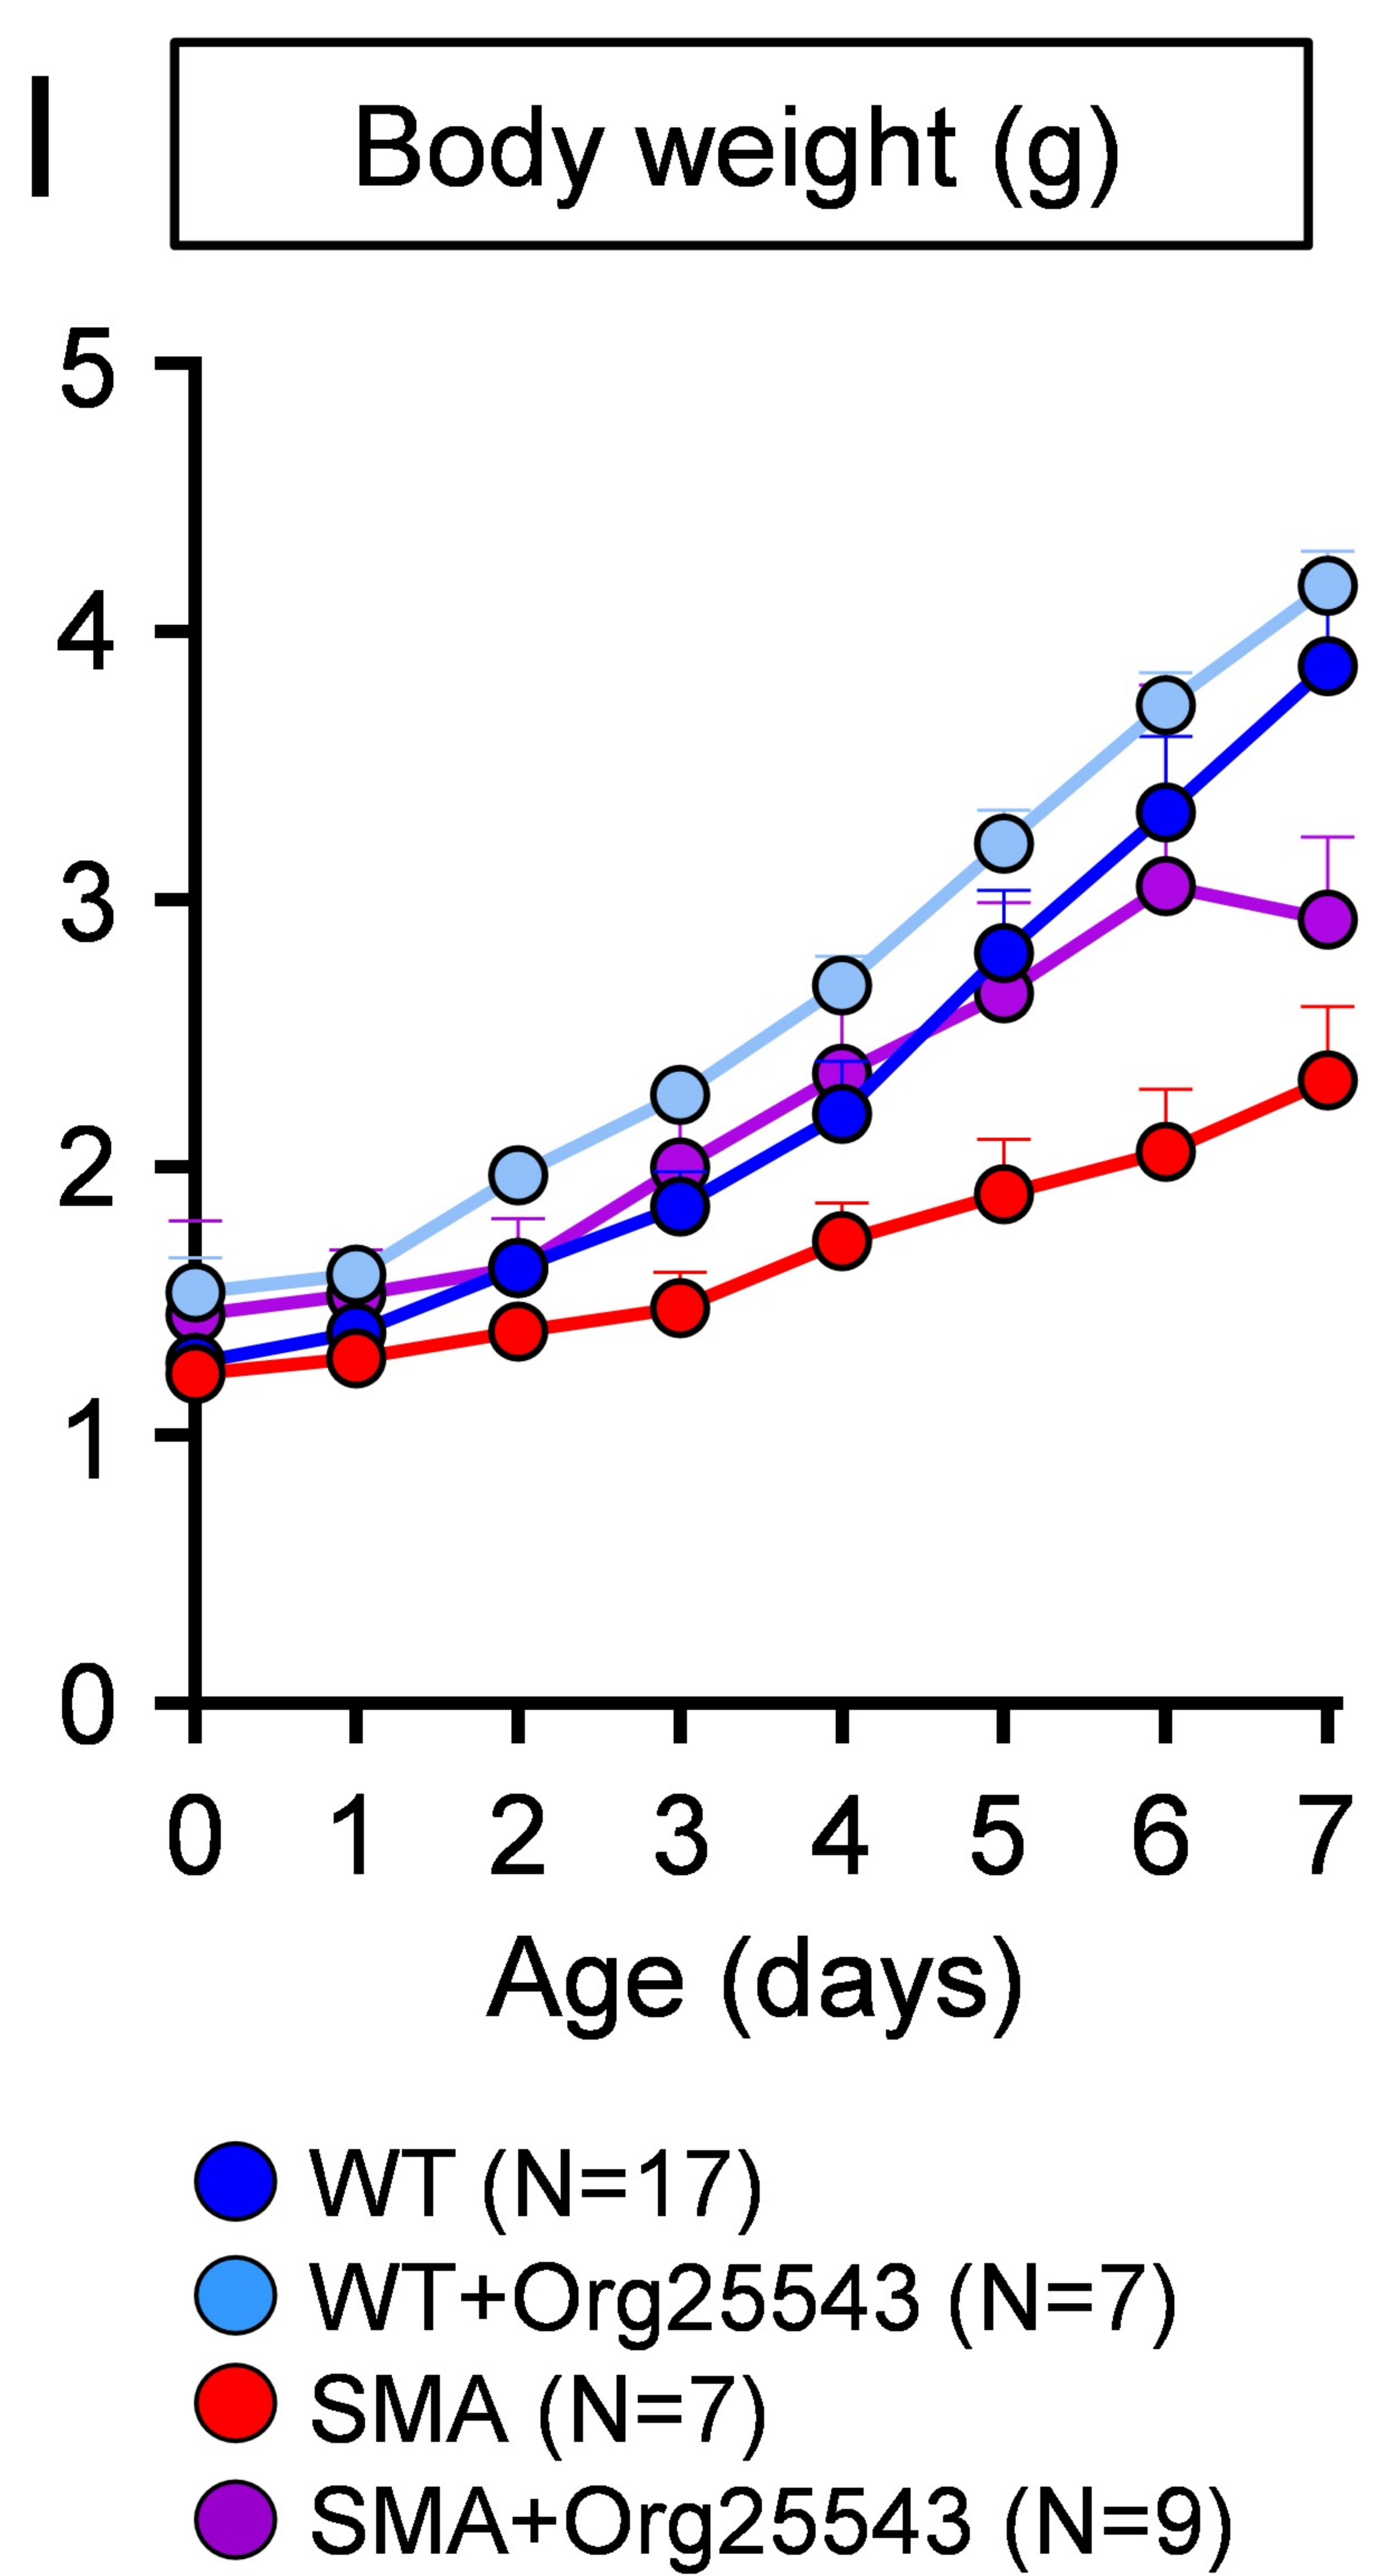

Supplement: NIHPP2024.08.30.610545v1-supplement-1.pdf [file NIHPP2024.08.30.610545v1-supplement-1.pdf]
